# Supplementary material
Source: PubMed Central journal article supplement (PMC3723930)
Supplement: NIHMS474977-supplement-1.pdf [file NIHMS474977-supplement-1.pdf]

## Meta-analysis identifies four new loci associated with testicular germ cell tumor

### SUPPLEMENTARY MATERIAL

Charles C. Chung<sup>1\*</sup>, Peter A. Kanetsky<sup>2,3\*</sup>, Zhaoming Wang<sup>1,4\*</sup>, Michelle A. T. Hildebrandt<sup>5\*</sup>, Roelof Koster<sup>6\*</sup>, Rolf I. Skotheim<sup>7,8\*</sup>, Christian P. Kratz<sup>1†</sup>, Clare Turnbull<sup>9\*</sup>, Victoria K. Cortessis<sup>10\*</sup>, Anne C. Bakken<sup>7,8</sup>, D. Timothy Bishop<sup>11</sup>, Michael B. Cook<sup>1</sup>, R. Loren Erickson<sup>12</sup>, Sophie D. Fosså<sup>13</sup>, Kevin B. Jacobs<sup>1,4</sup>, Larissa A. Korde<sup>1,14</sup>, Sigrid M. Kraggerud<sup>7,8</sup>, Ragnhild A. Lothe<sup>7,8</sup>, Jennifer T. Loud<sup>1</sup>, Nazneen Rahman<sup>9</sup>, Eila C. Skinner<sup>15</sup>, Duncan C. Thomas<sup>10</sup>, Xifeng Wu<sup>5</sup>, Meredith Yeager<sup>1,4</sup>, Fredrick R. Schumacher<sup>10</sup>, Mark H. Greene<sup>1</sup>, Stephen M. Schwartz<sup>16</sup>, Katherine A. McGlynn<sup>1</sup>, Stephen J. Chanock<sup>1‡</sup> & Katherine L. Nathanson<sup>3,6‡</sup>

Supplementary Note: Detailed description of all included studies with genotyping and quality control metrics used

Supplementary Table 1: Meta-analysis of reported TGCT susceptibility loci with two NCI GWAS

Supplementary Table 2: Summary of 40 SNPs with discovery meta-analysis P value < 10<sup>-4</sup> in association with testicular germ cell tumor

Supplementary Table 3: Description of the cohorts in TGCT meta-analysis

Supplementary Table 4: Meta-analysis results for 17 SNPs in association with TGCT

Supplementary Table 5: Summary of genomic annotation by HaploReg and RegulomeDB

Supplementary Table 6: Prediction of potential regulatory SNPs

Supplementary Table 7: Conditional analysis on the two multi-SNP loci identified by meta-analysis using NCI data

## **1. The US Servicemen's Testicular Tumor Environmental and Endocrine Determinants Study (STEED)**

The study description has been published in detail previously<sup>1</sup>. Briefly, between April 2002 and January 2005 Servicemen aged 18-45 years with at least one serum sample stored in the U.S. Department of Defense Serum Repository (DoDSR, Silver Spring, Maryland) were eligible for enrollment. By use of a person-specific identifier, the specimens in the DoDSR computerized database were linked to the Defense Medical Surveillance System (DMSS)<sup>2</sup> and to other military medical databases in order to determine which military personnel had developed medical conditions. All men with a sample in the DoDSR who subsequently developed testicular germ cell tumor (TGCT) while on active duty were eligible to participate as cases. Men with a sample in the DoDSR who did not subsequently develop TGCT were eligible to participate as controls. TGCT diagnoses were based on the original pathology reports or on review (6.5 %) of the pathology slides. The study was designed as a pair-matched, case-control study. Year of birth (within 1 year), race/ethnicity (White, Black, other), and date of available serum sample (within 30 days) were the characteristics used for matching. Of a total of 1,302 DNA specimens obtained from the study subjects<sup>3</sup>, 553 TGCT cases and 676 controls were genotyped on the Illumina 660K microarray SNP chip. Standard protocols for genotyping quality control (QC) were implemented. Individuals with missing rate > 0.06 and/or autosomal heterozygosity <0.25 or >0.35 (N=61) and SNPs with missing rate >0.1 and/or Hardy-Weinberg equilibrium p-value <1×10<sup>-7</sup> (N=113,525) were excluded. No individuals with cryptic relatedness (IBD greater than 45%) or unexpected duplicate was detected. Genotype concordance rate from 41 expected duplicates was greater than 99.9%. After further excluding ancestral outliers (N=134), in total, we included 479 TGCT cases (86.6%) and 555 controls (82.1%)<sup>4</sup>.

## **2. NCI Familial Testicular Cancer Study (FTCS)**

The NCI FTCS Study (NCI protocol 02-C-0178; NCT-00039598) consisted of 354 individuals drawn from 110 multiplex families, including 164 men with TGCT, both probands and affected male relatives<sup>5-8</sup>. Participants provided written informed consent, blood samples, and detailed questionnaire information. Genotypes were determined using the Illumina 660K microarray SNP chip. Standard protocols for genotyping QC were implemented. Individuals with missing rate >0.05 (N=9) and SNPs with missing rate >0.1 (N=99,032) were excluded. No individual was excluded due to autosomal heterozygosity <0.25 or >0.35. Twelve ancestral outliers were excluded. After QC, one case per each family was selected (51 unilateral cases and 13 bilateral cases from multi-case families, and 39 sporadic bilateral cases; total N=103) and compared with 501 controls from the Prostate, Lung, Colon and Ovarian (PLCO) Cancer Screening Trial study<sup>9</sup>.

## **3. University of Pennsylvania (UPENN)**

A total of 349 TGCT cases recruited from the University of Pennsylvania (Abramson Cancer Center) and Fox Chase Cancer Center were genotyped and compared to a control group of 919 men enrolled in the University of Pennsylvania Catherization Study (PennCATH)<sup>10</sup>. All genotyping was completed on the Affymetrix SNP 6.0 array. Detailed description of study samples and QC were reported previously<sup>11</sup>.

## **4. UK Testicular Cancer Consortium (UKTCC)**

A total of 979 TGCT cases including unrelated TGCT cases identified from a UK study of familial testicular cancer and a UK-wide hospital-based collection of TGCT cases were genotyped on the Illumina HumanCNV370-Duo bead array. These genotypes were compared to those of 4947 controls from the 1958 Birth Cohort and the UK National Blood Service, that were genotyped by the Wellcome

Trust Case Control Consortium (WTCCC2) using the Illumina 1.2M array. Details of QC and study description were reported previously<sup>12</sup>.

## **5. University of Southern California (USC)**

Individuals analyzed are part of a population-based study at the University of Southern California based in the California and the California Cancer Registry (CCR). Among men diagnosed from the inception of each of the 10 regional registries through 2006 and more recently referred by collaborating clinicians and survivor groups, 5,792 men provided family and personal medical history information, 548 reporting two primary TGCTs, 642 reporting personal history of cryptorchidism, and 886 reporting family history of TGCT and/or cryptorchidism. Families oversampled among these sets were invited to participate by providing biospecimens from the index case, affected family members, and additional relatives informative for genetic linkage of association, 3247 individuals in all. The present analysis was limited to non-Hispanic white participants for whom genomic DNA was available at the time of genotypic analysis: Genotypes were determined using the Illumina 610K platform for 376 index TGCT cases – primarily those without participating family members<sup>4</sup> – and – and 258 non-Hispanic white TGCT controls from the Multiethnic Cohort (MEC) study. Our control sample has been described elsewhere<sup>13</sup>. Briefly, we utilized cancer-free controls from the MEC contribution to the NCI Breast & Prostate Cancer Cohort Consortium genome-wide study of aggressive prostate cancer. Both our TGCT case and control series were genotyped using the Illumina 610K platform at the USC Epigenome Center. Standard protocols for genotyping quality control (QC) were implemented. Individuals and SNPs were excluded where call rates were <98% (N=6 individuals; N=39,874 SNPs), autosomal heterozygosity <0.25 or >0.35 (N=0), high heterozygosity on the X chromosome (N=1), unexpected related subjects (N=2), and ancestral outliers (N=11). In total, we included 358 TGCT cases (95.2%) and 258 controls (99.2%).

## **6. Oslo University Hospital-Radium Hospital, Norway (OUHRH)**

Since 1980, men with TGCT have been recruited at the Norwegian Radium Hospital (Rikshospitalet), which has now merged with the Oslo University Hospital. This cohort of men with TGCT (along with other TGCT patients collected through other Norwegian oncology hospitals) has been extensively studied in previous studies of genetic polymorphisms in candidate genes<sup>14,15</sup> and in the context of survivorship issues<sup>14,15</sup>. A total of 865 TGCT cases and 392 controls were genotyped using optimized TaqMan assays (ABI 7900HT Real-Time PCR System, Applied Biosystems by Life Technologies, Foster City, CA) and compared with 392 controls of the Cohort of Norway (CONOR) who were also analyzed by TaqMan. These controls were male, cancer free controls males who were military recruits or employees in a Norwegian company were analyzed previously in the third stage of the prostate cancer GWAS as part of the Cancer Genetic Markers of Susceptibility (CGEMS)<sup>16</sup>.

## **7. The Testicular Cancer in Philadelphia Area Counties study (TestPAC)**

This study is an NCI funded population-based case-control study set in Philadelphia, Pennsylvania and its seven neighboring counties. Cases and controls complete a self-administered questionnaire eliciting information on established and putative TGCT risk factors, and each gives a blood or saliva sample for isolation of DNA. A total of 331 cases and 683 controls, distinct from the PENN set were genotyped using iPlex (Sequenom, Inc.).

## **8. The Adult Testicular Lifestyle and Blood Specimen study (ATLAS)**

This study is an NCI-funded population-based case-control and case-parent triad/dyad study conducted in western Washington State<sup>17,18</sup>. Cases were identified through the Seattle-Puget Sound SEER registry, and controls through random-digit dialing. All study participants completed an in-person

interview to ascertain known and suspected TGCT risk factors, and provided a blood sample (90%) or oral buccal cell sample (10%) from which DNA was extracted by a standard method. A total of 439 TGCT cases and 960 controls were genotyped using iPLEX (Sequenom, Inc.).

#### **9. M.D. Anderson Cancer Center (MDA)**

Cases of TGCT were recruited through clinics at the University of Texas MD Anderson Cancer Center. Cases were over 18 years of age at the time of recruitment. Each patient completed a questionnaire on demographics, education, medical history, smoking behavior, alcohol use, work history, medication use, and family history. Controls were genotyped using the Illumina HumanHap610 Beadchip previously as part of a GWAS for bladder cancer<sup>19</sup>. Briefly, controls were of European descent and recruited from Kelsey Seybold Clinics in the Houston, Texas metropolitan area. All participants provided written informed consent prior to providing blood specimens for processing and genotyping at MD Anderson Cancer Center. Study approval was granted by the Institutional Review Board of both MD Anderson Cancer Center and Kelsey Seybold Clinics. A total of 304 TGCT cases were genotyped using the optimized TaqMan assays and 239 non-admixed European cases were compared with 351 controls drawn from the previous bladder cancer GWAS.

## References

1. McGlynn, K.A. *et al.* Body size, dairy consumption, puberty, and risk of testicular germ cell tumors. *Am J Epidemiol* **165**, 355-63 (2007).
2. Rubertone, M.V. & Brundage, J.F. The Defense Medical Surveillance System and the Department of Defense serum repository: glimpses of the future of public health surveillance. *Am J Public Health* **92**, 1900-4 (2002).
3. Purdue, M.P. *et al.* Genetic variation in the inhibin pathway and risk of testicular germ cell tumors. *Cancer Res* **68**, 3043-8 (2008).
4. Schumacher, F.R. *et al.* Testicular germ cell tumor susceptibility associated with the *UCK2* locus on chromosome 1q23. *Hum Mol Genet* (In press).
5. Peters, J.A. *et al.* Testicular cancer and genetics knowledge among familial testicular cancer family members. *J Genet Couns* **17**, 351-64 (2008).
6. Peters, J.A. *et al.* Familial testicular cancer: interest in genetic testing among high-risk family members. *Genet Med* **8**, 760-70 (2006).
7. Korde, L.A. *et al.* Increased prevalence of testicular microlithiasis in men with familial testicular cancer and their relatives. *Br J Cancer* **99**, 1748-53 (2008).
8. Kratz, C.P. *et al.* Variants in or near *KITLG*, *BAK1*, *DMRT1*, and *TERT-CLPTM1L* predispose to familial testicular germ cell tumour. *J Med Genet* **48**, 473-6 (2011).
9. Landi, M.T. *et al.* A genome-wide association study of lung cancer identifies a region of chromosome 5p15 associated with risk for adenocarcinoma. *Am J Hum Genet* **85**, 679-91 (2009).
10. Lehrke, M. *et al.* CXCL16 is a marker of inflammation, atherosclerosis, and acute coronary syndromes in humans. *J Am Coll Cardiol* **49**, 442-9 (2007).
11. Kanetsky, P.A. *et al.* A second independent locus within *DMRT1* is associated with testicular germ cell tumor susceptibility. *Hum Mol Genet* **20**, 3109-17 (2011).
12. Turnbull, C. *et al.* Variants near *DMRT1*, *TERT* and *ATF7IP* are associated with testicular germ cell cancer. *Nat Genet* **42**, 604-7 (2010).
13. Schumacher, F.R. *et al.* Genome-wide association study identifies new prostate cancer susceptibility loci. *Hum Mol Genet* **20**, 3867-75 (2011).
14. Dahl, C.F. *et al.* A controlled study of risk factors for disease and current problems in long-term testicular cancer survivors. *J Cancer Surviv* **4**, 256-65 (2010).
15. Haugnes, H.S. *et al.* Cardiovascular risk factors and morbidity in long-term survivors of testicular cancer: a 20-year follow-up study. *J Clin Oncol* **28**, 4649-57 (2010).
16. Yeager, M. *et al.* Identification of a new prostate cancer susceptibility locus on chromosome 8q24. *Nat Genet* **41**, 1055-7 (2009).
17. Starr, J.R. *et al.* Risk of testicular germ cell cancer in relation to variation in maternal and offspring cytochrome p450 genes involved in catechol estrogen metabolism. *Cancer Epidemiol Biomarkers Prev* **14**, 2183-90 (2005).
18. Daling, J.R. *et al.* Association of marijuana use and the incidence of testicular germ cell tumors. *Cancer* **115**, 1215-23 (2009).
19. Wu, X. *et al.* Genetic variation in the prostate stem cell antigen gene *PSCA* confers susceptibility to urinary bladder cancer. *Nat Genet* **41**, 991-5 (2009).

## Supplementary Tables

**Supplementary Table 1** Meta-analysis of reported TGCT susceptibility loci with two NCI GWAS

| SNP <sup>1</sup> | Nearby genes | Study <sup>2</sup> | Allelic OR (95% CI) | P value  | P for heterogeneity |
|------------------|--------------|--------------------|---------------------|----------|---------------------|
| rs4657482        | <i>UCK2</i>  | UK1                | 1.39 (1.21-1.59)    | 1.60E-06 |                     |
| G A              | 1q24.1       | UK2                | 1.14 (0.99-1.31)    | 0.07     |                     |
|                  |              | NCI                | 1.43 (1.22-1.67)    | 5.97E-06 |                     |
|                  |              | Combined           | 1.31 (1.20-1.42)    | 2.17E-10 | 0.059               |
|                  |              |                    |                     |          |                     |
| rs4699052        | <i>CENPE</i> | UK1                | 0.72 (0.63-0.83)    | 3.00E-06 |                     |
| C T              | 4q24         | UK2                | 0.83 (0.72-0.95)    | 8.00E-03 |                     |
|                  |              | NCI                | 0.82 (0.70-0.96)    | 0.015    |                     |
|                  |              | Combined           | 0.79 (0.72-0.85)    | 1.03E-08 | 0.328               |
|                  |              |                    |                     |          |                     |
| rs4624820        | <i>SPRY4</i> | UK1                | 0.68 (0.60-0.77)    | 4.60E-09 |                     |
| A G              | 5q31.3       | UK2                | 0.73 (0.63-0.84)    | 6.70E-06 |                     |
|                  |              | NCI                | 0.61 (0.53-0.72)    | 8.36E-10 |                     |
|                  |              | Combined           | 0.68 (0.62-0.74)    | 8.04E-21 | 0.282               |
|                  |              |                    |                     |          |                     |
| rs210138         | <i>BAK1</i>  | UK1                | 1.5 (1.30-1.74)     | 4.50E-08 |                     |
| A G              | 6p21.31      | UK2                | 1.5 (1.28-1.75)     | 6.60E-07 |                     |
|                  |              | NCI                | 1.62 (1.35-1.95)    | 2.83E-07 |                     |
|                  |              | Combined           | 1.53 (1.39-1.68)    | 2.28E-19 | 0.778               |
|                  |              |                    |                     |          |                     |
| rs995030         | <i>KITLG</i> | UK1                | 0.44 (0.36-0.53)    | 1.90E-18 |                     |
| G A              | 12q21.32     | UK2                | 0.39 (0.31-0.49)    | 1.20E-19 |                     |
|                  |              | NCI                | 0.43 (0.34-0.54)    | 3.17E-13 |                     |
|                  |              | Combined           | 0.42 (0.37-0.48)    | 9.59E-43 | 0.748               |
|                  |              |                    |                     |          |                     |
| rs1508595        | <i>KITLG</i> | UK1                | 0.39 (0.31-0.49)    | 1.90E-19 |                     |
| C T              | 12q21.32     | UK2                | 0.37 (0.29-0.48)    | 4.90E-18 |                     |
|                  |              | NCI                | 0.42 (0.33-0.54)    | 1.29E-12 |                     |
|                  |              | Combined           | 0.39 (0.34-0.45)    | 8.40E-41 | 0.796               |
|                  |              |                    |                     |          |                     |
| rs6897876        | <i>SPRY4</i> | UPENN1             | 1.59 (1.30-1.94)    | 3.57E-06 |                     |
| T C              | 5q31.3       | UPENN2             | 1.37 (1.14-1.64)    | 6.77E-04 |                     |
|                  |              | Combined           | 1.47 (1.28-1.68)    | 2.00E-08 | 0.277               |
|                  |              |                    |                     |          |                     |
|                  |              |                    |                     |          |                     |
| rs4324715        | <i>SPRY4</i> | UPENN1             | 0.63 (0.52-0.77)    | 2.96E-06 |                     |
| T C              | 5q31.3       | UPENN2             | 0.72 (0.60-0.86)    | 3.67E-04 |                     |
|                  |              | NCI                | 0.63 (0.53-0.75)    | 1.42E-07 |                     |
|                  |              | Combined           | 0.66 (0.59-0.73)    | 8.57E-15 | 0.492               |
|                  |              |                    |                     |          |                     |
| rs3782179        | <i>KITLG</i> | UPENN1             | 2.45 (1.79-3.35)    | 7.34E-09 |                     |
| G A              | 12q21.32     | UPENN2             | 3.07 (2.29-4.12)    | 5.88E-15 |                     |
|                  |              | Combined           | 2.76 (2.23-3.42)    | 1.85E-20 | 0.304               |
|                  |              |                    |                     |          |                     |
| rs4474514        | <i>KITLG</i> | UPENN1             | 2.36 (1.73-3.21)    | 1.95E-08 |                     |
| G A              | 12q21.32     | UPENN2             | 3.08 (2.29-4.14)    | 5.88E-15 |                     |
|                  |              | Combined           | 2.71 (2.19-3.36)    | 4.78E-20 | 0.222               |
|                  |              |                    |                     |          |                     |
| rs2736100        | <i>TERT</i>  | UK3                | 0.74 (0.67-0.81)    | 2.80E-10 |                     |
| T G              | 5p15.33      | UK4                | 0.75 (0.67-0.85)    | 4.90E-06 |                     |
|                  |              | NCI                | 0.73 (0.63-0.85)    | 4.82E-05 |                     |
|                  |              | Combined           | 0.74 (0.69-0.79)    | 1.32E-18 | 0.952               |
|                  |              |                    |                     |          |                     |

|           |                     |          |                  |          |       |
|-----------|---------------------|----------|------------------|----------|-------|
| rs4635969 | <i>TERT-CLPTM1L</i> | UK3      | 1.65 (1.47-1.86) | 9.60E-17 |       |
| C T       | 5p15.33             | UK4      | 1.54 (1.33-1.79) | 1.40E-08 |       |
|           |                     | NCI      | 1.4 (1.17-1.68)  | 2.22E-04 |       |
|           |                     | Combined | 1.56 (1.44-1.69) | 1.87E-26 | 0.319 |
| rs755383  | <i>DMRT1</i>        | UK3      | 0.64 (0.58-0.71) | 8.10E-19 |       |
| T C       | 9p24.3              | UK4      | 0.73 (0.64-0.83) | 5.70E-07 |       |
|           |                     | NCI      | 0.66 (0.56-0.77) | 4.25E-07 |       |
|           |                     | Combined | 0.67 (0.62-0.72) | 1.46E-28 | 0.242 |
| rs2900333 | <i>ATF7IP</i>       | UK3      | 0.78 (0.70-0.86) | 7.60E-07 |       |
| C T       | 12p13.1             | UK4      | 0.79 (0.69-0.89) | 2.00E-04 |       |
|           |                     | NCI      | 0.93 (0.79-1.09) | 0.344    |       |
|           |                     | Combined | 0.81 (0.75-0.87) | 2.08E-09 | 0.162 |

<sup>1</sup> SNP genotype depicted as reference allele|effect allele

<sup>2</sup> UK1 and UK2 data were taken from Rapley et al., UPENN1 and UPENN2 data were taken from Kanetsky et al., and UK3 and UK4 data were taken from Turnbull et al.

NCI depicts combined analysis results of the two GWAS scans STEED and FTCS performed at NCI

**Supplementary Table 2** Summary of 40 SNPs with discovery meta-analysis  $P$  value  $< 10^{-4}$  in association with testicular germ cell tumor

| Locus Information |                   |                  |                  | NCI+Penn Meta-analysis |                 |                  |       |                         |                         |                         | 1000 Genomes Feb2012 EUR (n=379) |                |               |           |        |              |              |              |
|-------------------|-------------------|------------------|------------------|------------------------|-----------------|------------------|-------|-------------------------|-------------------------|-------------------------|----------------------------------|----------------|---------------|-----------|--------|--------------|--------------|--------------|
| Cytoband          | Gene neighborhood | annotation       | Study            | SNP                    | Location        | ref eff          | EAF   | Allelic OR              | 95% CI                  | $P$ value               | $P$ for heterogeneity            | Meta. $P$ rank | MA            | MAF       | $r^2$  | $D'$         | haplotype    |              |
| 3p26.1            | AF279782          |                  | NCI              | rs17288317             | 6625357         | T C              | 0.381 | 1.32 (1.13-1.54)        |                         | 3.54E-04                |                                  |                | C             | 0.3404    |        |              |              |              |
|                   |                   |                  | UPENN            | rs2323813              | 6679798         | T C              | 0.415 | 1.19 (0.99-1.41)        |                         | 0.0568                  |                                  |                | G             | 0.4116    |        |              |              |              |
|                   |                   |                  | <b>NCI+UPENN</b> |                        |                 |                  |       |                         |                         | <b>1.26 (1.12-1.42)</b> | <b>8.45E-05</b>                  |                | <b>0.3578</b> | <b>39</b> |        | <b>0.578</b> | <b>0.885</b> | <b>CG/TA</b> |
|                   |                   |                  | NCI              | rs9811958              | 6678484         | A C              | 0.494 | 1.4 (1.21-1.63)         |                         | 1.08E-05                |                                  |                |               | C         | 0.4406 |              |              |              |
|                   |                   |                  | UPENN            | rs4686074              | 6682834         | G C              | 0.435 | 1.12 (0.94-1.33)        |                         | 0.2254                  |                                  |                |               | G         | 0.4406 |              |              |              |
|                   |                   |                  | <b>NCI+UPENN</b> |                        |                 |                  |       |                         |                         | <b>1.27 (1.13-1.43)</b> | <b>3.80E-05</b>                  |                | <b>0.0547</b> | <b>29</b> |        | <b>1</b>     | <b>1</b>     | <b>CG/AC</b> |
| 4q22.3            | SMARCD1<br>HPGDS  | intron           | NCI              | rs11097408             | 95165662        | C T              | 0.474 | 1.33 (1.14-1.55)        |                         | 2.42E-04                |                                  |                | T             | 0.4472    |        |              |              |              |
|                   |                   | intron           | UPENN            | rs2632412              | 95149319        | A C              | 0.433 | 1.28 (1.07-1.53)        |                         | 6.67E-03                |                                  |                | G             | 0.4367    |        |              |              |              |
|                   |                   |                  | <b>NCI+UPENN</b> |                        |                 |                  |       |                         |                         | <b>1.31 (1.16-1.47)</b> | <b>5.54E-06</b>                  |                | <b>0.7423</b> | <b>19</b> |        | <b>0.958</b> | <b>1</b>     | <b>TG/CT</b> |
|                   |                   | intron           | NCI              | rs6532476              | 95192461        | A C              | 0.474 | 1.31 (1.13-1.53)        |                         | 4.25E-04                |                                  |                |               | C         | 0.4499 |              |              |              |
|                   |                   | intron           | UPENN            | rs2632412              | 95149319        | A C              | 0.433 | 1.28 (1.07-1.53)        |                         | 6.67E-03                |                                  |                |               | G         | 0.4367 |              |              |              |
|                   |                   |                  | <b>NCI+UPENN</b> |                        |                 |                  |       |                         |                         | <b>1.3 (1.16-1.46)</b>  | <b>9.29E-06</b>                  |                | <b>0.8172</b> | <b>24</b> |        | <b>0.948</b> | <b>1</b>     | <b>CG/AT</b> |
|                   |                   | intron           | NCI              | rs17021463             | 95224812        | G T              | 0.475 | 1.33 (1.14-1.55)        |                         | 2.12E-04                |                                  |                |               | T         | 0.4485 |              |              |              |
|                   |                   | intron           | UPENN            | rs2632412              | 95149319        | A C              | 0.433 | 1.28 (1.07-1.53)        |                         | 6.67E-03                |                                  |                |               | G         | 0.4367 |              |              |              |
|                   |                   |                  | <b>NCI+UPENN</b> |                        |                 |                  |       |                         |                         | <b>1.31 (1.17-1.47)</b> | <b>4.91E-06</b>                  |                | <b>0.7302</b> | <b>15</b> |        | <b>0.953</b> | <b>1</b>     | <b>TG/GT</b> |
|                   |                   |                  | intron           | NCI                    | rs10516950      | 95254730         | G A   | 0.499                   | 1.3 (1.12-1.52)         |                         | 5.85E-04                         |                |               |           |        |              |              |              |
|                   |                   |                  | UPENN            | rs10516950             | 95254730        | C T              | 0.473 | 1.27 (1.06-1.52)        |                         | 9.28E-03                |                                  |                |               |           |        |              |              |              |
|                   |                   |                  | <b>NCI+UPENN</b> | <b>rs10516950</b>      | <b>95254730</b> |                  |       |                         |                         | <b>1.29 (1.15-1.45)</b> | <b>1.70E-05</b>                  |                | <b>0.8365</b> | <b>26</b> |        |              |              |              |
| 6q24.2            |                   |                  | NCI              | rs7760281              | 144446518       | T C              | 0.448 | 1.3 (1.12-1.51)         |                         | 6.72E-04                |                                  |                |               |           |        |              |              |              |
|                   |                   |                  | UPENN            | rs7760281              | 144446518       | A G              | 0.409 | 1.21 (1.01-1.45)        |                         | 0.0358                  |                                  |                |               |           |        |              |              |              |
|                   |                   | <b>NCI+UPENN</b> | <b>rs7760281</b> | <b>144446518</b>       |                 |                  |       |                         | <b>1.26 (1.12-1.42)</b> | <b>8.11E-05</b>         |                                  | <b>0.5513</b>  | <b>38</b>     |           |        |              |              |              |
| 7p22.3            | MAD1L1            | intron           | NCI              | rs10275045             | 1920826         | C T              | 0.48  | 1.36 (1.17-1.57)        |                         | 5.19E-05                |                                  |                |               |           |        |              |              |              |
|                   |                   | intron           | UPENN            | rs10275045             | 1920826         | C T              | 0.440 | 1.39 (1.17-1.65)        |                         | 1.92E-04                |                                  |                |               |           |        |              |              |              |
|                   |                   |                  | <b>NCI+UPENN</b> | <b>rs10275045</b>      | <b>1920826</b>  |                  |       |                         |                         | <b>1.37 (1.22-1.53)</b> | <b>3.94E-08</b>                  |                | <b>0.8372</b> | <b>3</b>  |        |              |              |              |
|                   |                   | intron           | NCI              | rs6952727              | 1947958         | A G              | 0.482 | 1.35 (1.16-1.56)        |                         | 9.41E-05                |                                  |                |               | G         | 0.4222 |              |              |              |
|                   |                   | intron           | UPENN            | rs4721190              | 1954732         | G A              | 0.444 | 1.4 (1.17-1.66)         |                         | 1.64E-04                |                                  |                |               | A         | 0.4208 |              |              |              |
|                   |                   |                  | <b>NCI+UPENN</b> |                        |                 |                  |       |                         |                         | <b>1.37 (1.22-1.53)</b> | <b>6.34E-08</b>                  |                | <b>0.7481</b> | <b>6</b>  |        | <b>0.962</b> | <b>0.984</b> | <b>GA/AG</b> |
|                   |                   | intron           | NCI              | rs4721184              | 1950784         | T C              | 0.443 | 1.34 (1.15-1.56)        |                         | 1.36E-04                |                                  |                |               | C         | 0.3905 |              |              |              |
|                   |                   | intron           | UPENN            | rs2056480              | 1954301         | G A              | 0.407 | 1.37 (1.15-1.63)        |                         | 4.25E-04                |                                  |                |               | A         | 0.3879 |              |              |              |
|                   |                   |                  | <b>NCI+UPENN</b> |                        |                 |                  |       |                         |                         | <b>1.35 (1.21-1.52)</b> | <b>2.21E-07</b>                  |                | <b>0.8557</b> | <b>10</b> |        | <b>0.978</b> | <b>0.994</b> | <b>CA/TG</b> |
|                   |                   | intron           | NCI              | rs11772205             | 1951236         | C T              | 0.483 | 1.35 (1.16-1.56)        |                         | 8.89E-05                |                                  |                |               | T         | 0.4248 |              |              |              |
|                   |                   | intron           | UPENN            | rs4721190              | 1954732         | G A              | 0.444 | 1.4 (1.17-1.66)         |                         | 1.64E-04                |                                  |                |               | A         | 0.4208 |              |              |              |
|                   |                   |                  | <b>NCI+UPENN</b> |                        |                 |                  |       |                         |                         | <b>1.37 (1.22-1.53)</b> | <b>5.99E-08</b>                  |                | <b>0.7574</b> | <b>4</b>  |        | <b>0.973</b> | <b>0.995</b> | <b>TA/CG</b> |
|                   |                   | intron           | NCI              | rs12699477             | 1968953         | T C              | 0.412 | 1.31 (1.13-1.53)        |                         | 4.64E-04                |                                  |                |               | C         | 0.3654 |              |              |              |
|                   |                   | intron           | UPENN            | rs2056480              | 1954301         | G A              | 0.407 | 1.37 (1.15-1.63)        |                         | 4.25E-04                |                                  |                |               | A         | 0.3879 |              |              |              |
|                   |                   |                  | <b>NCI+UPENN</b> |                        |                 |                  |       |                         |                         | <b>1.34 (1.19-1.50)</b> | <b>7.54E-07</b>                  |                | <b>0.7139</b> | <b>12</b> |        | <b>0.791</b> | <b>0.933</b> | <b>CA/TG</b> |
|                   |                   | intron           | NCI              | rs12666575             | 2004421         | C T              | 0.43  | 1.35 (1.16-1.57)        |                         | 1.19E-04                |                                  |                |               | T         | 0.3747 |              |              |              |
|                   |                   | intron           | UPENN            | rs4721295              | 2036669         | T G              | 0.418 | 1.38 (1.16-1.65)        |                         | 2.78E-04                |                                  |                |               | G         | 0.3799 |              |              |              |
|                   |                   |                  | <b>NCI+UPENN</b> |                        |                 |                  |       |                         |                         | <b>1.36 (1.22-1.53)</b> | <b>1.28E-07</b>                  |                | <b>0.8245</b> | <b>8</b>  |        | <b>0.901</b> | <b>0.96</b>  | <b>TG/CT</b> |
| intron            | NCI               | rs3778969        | 2139990          | G A                    | 0.445           | 1.37 (1.17-1.59) |       | 6.17E-05                |                         |                         |                                  |                |               |           |        |              |              |              |
| intron            | UPENN             | rs3778969        | 2139990          | G A                    | 0.398           | 1.4 (1.17-1.67)  |       | 2.50E-04                |                         |                         |                                  |                |               |           |        |              |              |              |
|                   | <b>NCI+UPENN</b>  | <b>rs3778969</b> | <b>2139990</b>   |                        |                 |                  |       | <b>1.38 (1.23-1.55)</b> | <b>6.24E-08</b>         |                         | <b>0.8538</b>                    | <b>5</b>       |               |           |        |              |              |              |
| intron            | NCI               | rs3800913        | 2163237          | A G                    | 0.473           | 1.35 (1.16-1.57) |       | 9.34E-05                |                         |                         |                                  |                | G             | 0.4142    |        |              |              |              |



|         |                                                                  |              |                  |                  |                 |     |       |                         |                 |               |           |   |         |              |              |              |  |
|---------|------------------------------------------------------------------|--------------|------------------|------------------|-----------------|-----|-------|-------------------------|-----------------|---------------|-----------|---|---------|--------------|--------------|--------------|--|
|         |                                                                  | intron       | UPENN            | rs10224497       | 2149967         | A G | 0.443 | 1.42 (1.19-1.69)        | 8.89E-05        |               |           | G | 0.4261  |              |              |              |  |
|         |                                                                  |              | <b>NCI+UPENN</b> |                  |                 |     |       | <b>1.38 (1.23-1.55)</b> | <b>3.66E-08</b> | <b>0.6662</b> | <b>2</b>  |   |         | <b>0.921</b> | <b>0.983</b> | <b>GG/AA</b> |  |
|         |                                                                  | intron       | NCI              | rs10256077       | 2171450         | T C | 0.493 | 1.31 (1.13-1.52)        | 4.28E-04        |               |           | C | 0.4314  |              |              |              |  |
|         |                                                                  | intron       | UPENN            | rs10224497       | 2149967         | A G | 0.443 | 1.42 (1.19-1.69)        | 8.89E-05        |               |           | G | 0.4261  |              |              |              |  |
|         |                                                                  |              | <b>NCI+UPENN</b> |                  |                 |     |       | <b>1.36 (1.21-1.52)</b> | <b>1.83E-07</b> | <b>0.4865</b> | <b>9</b>  |   |         | <b>0.894</b> | <b>0.956</b> | <b>CG/TA</b> |  |
|         |                                                                  | intron       | NCI              | rs3778991        | 2172455         | G A | 0.425 | 1.38 (1.18-1.61)        | 4.76E-05        |               |           | A | 0.3628  |              |              |              |  |
|         |                                                                  | intron       | UPENN            | rs3779003        | 2184902         | C T | 0.365 | 1.43 (1.19-1.71)        | 1.02E-04        |               |           | T | 0.3641  |              |              |              |  |
|         |                                                                  |              | <b>NCI+UPENN</b> |                  |                 |     |       | <b>1.4 (1.24-1.57)</b>  | <b>2.10E-08</b> | <b>0.7661</b> | <b>1</b>  |   |         | <b>0.983</b> | <b>0.994</b> | <b>AT/GC</b> |  |
|         |                                                                  | intron       | NCI              | rs3778994        | 2175855         | C A | 0.454 | 1.33 (1.14-1.55)        | 1.96E-04        |               |           |   |         |              |              |              |  |
|         |                                                                  |              | UPENN            | rs3778994        | 2175855         | G T | 0.409 | 1.35 (1.14-1.60)        | 6.22E-04        |               |           |   |         |              |              |              |  |
|         |                                                                  |              | <b>NCI+UPENN</b> | <b>rs3778994</b> | <b>2175855</b>  |     |       | <b>1.34 (1.20-1.50)</b> | <b>4.40E-07</b> | <b>0.8947</b> | <b>11</b> |   |         |              |              |              |  |
|         |                                                                  | intron       | NCI              | rs3800924        | 2188249         | C T | 0.359 | 1.35 (1.15-1.58)        | 2.38E-04        |               |           | T | 0.3285  |              |              |              |  |
|         |                                                                  | intron       | UPENN            | rs4721441        | 2184060         | A G | 0.389 | 1.28 (1.07-1.53)        | 5.92E-03        |               |           | C | 0.3641  |              |              |              |  |
|         |                                                                  |              | <b>NCI+UPENN</b> |                  |                 |     |       | <b>1.32 (1.17-1.49)</b> | <b>4.98E-06</b> | <b>0.6909</b> | <b>16</b> |   |         | <b>0.821</b> | <b>0.98</b>  | <b>TC/CT</b> |  |
|         |                                                                  |              | NCI              | rs7204293        | 50028105        | G A | 0.05  | 0.54 (0.40-0.75)        | 1.59E-04        |               |           | A | 0.05805 |              |              |              |  |
|         |                                                                  |              | UPENN            | rs12445755       | 50034945        | A G | 0.073 | 0.6 (0.41-0.88)         | 9.75E-03        |               |           | C | 0.06992 |              |              |              |  |
|         |                                                                  |              | <b>NCI+UPENN</b> |                  |                 |     |       | <b>0.57 (0.44-0.72)</b> | <b>6.11E-06</b> | <b>0.7060</b> | <b>21</b> |   |         | <b>0.78</b>  | <b>0.975</b> | <b>AC/GT</b> |  |
| 16q12.1 | <i>HEATR3</i><br><i>AF086132</i>                                 | intron       | NCI              | rs8046148        | 50142944        | G A | 0.177 | 0.7 (0.58-0.85)         | 2.12E-04        |               |           | A | 0.1926  |              |              |              |  |
|         |                                                                  |              | UPENN            | rs2058813        | 50129454        | C T | 0.191 | 0.82 (0.65-1.03)        | 0.0923          |               |           | T | 0.1715  |              |              |              |  |
|         |                                                                  |              | <b>NCI+UPENN</b> |                  |                 |     |       | <b>0.75 (0.65-0.86)</b> | <b>8.93E-05</b> | <b>0.2997</b> | <b>42</b> |   |         | <b>0.868</b> | <b>1</b>     | <b>AT/GC</b> |  |
|         |                                                                  |              | NCI              | rs1496430        | 51096349        | C T | 0.243 | 1.44 (1.19-1.74)        | 1.32E-04        |               |           | T | 0.1715  |              |              |              |  |
|         |                                                                  |              | UPENN            | rs1566043        | 51113337        | G A | 0.147 | 1.2 (0.94-1.54)         | 0.1411          |               |           | A | 0.1319  |              |              |              |  |
|         |                                                                  |              | <b>NCI+UPENN</b> |                  |                 |     |       | <b>1.35 (1.16-1.56)</b> | <b>9.08E-05</b> | <b>0.2493</b> | <b>43</b> |   |         | <b>0.734</b> | <b>1</b>     | <b>TA/CG</b> |  |
|         |                                                                  | missense     | NCI              | rs7193541        | 74664743        | T C | 0.359 | 0.76 (0.65-0.88)        | 4.24E-04        |               |           |   |         |              |              |              |  |
|         |                                                                  | lle>Val      | UPENN            | rs7193541        | 74664743        | T C | 0.396 | 0.83 (0.69-1.00)        | 0.0503          |               |           |   |         |              |              |              |  |
|         |                                                                  |              | <b>NCI+UPENN</b> | <b>rs7193541</b> | <b>74664743</b> |     |       | <b>0.79 (0.70-0.89)</b> | <b>7.86E-05</b> | <b>0.4414</b> | <b>37</b> |   |         |              |              |              |  |
|         |                                                                  | coding-synon | NCI              | rs4888262        | 74670458        | T C | 0.552 | 1.36 (1.16-1.58)        | 9.12E-05        |               |           |   |         |              |              |              |  |
|         |                                                                  | Thr>Thr      | UPENN            | rs4888262        | 74670458        | T C | 0.498 | 1.39 (1.16-1.67)        | 3.12E-04        |               |           |   |         |              |              |              |  |
|         |                                                                  |              | <b>NCI+UPENN</b> | <b>rs4888262</b> | <b>74670458</b> |     |       | <b>1.37 (1.22-1.54)</b> | <b>1.12E-07</b> | <b>0.8255</b> | <b>7</b>  |   |         |              |              |              |  |
|         |                                                                  | intron       | NCI              | rs4888265        | 74683737        | C T | 0.553 | 1.35 (1.16-1.57)        | 1.26E-04        |               |           | C | 0.4789  |              |              |              |  |
|         |                                                                  | intron       | UPENN            | rs8062783        | 74691264        | C T | 0.482 | 1.31 (1.09-1.57)        | 3.35E-03        |               |           | C | 0.4763  |              |              |              |  |
|         |                                                                  |              | <b>NCI+UPENN</b> |                  |                 |     |       | <b>1.33 (1.19-1.50)</b> | <b>1.51E-06</b> | <b>0.8069</b> | <b>13</b> |   |         | <b>0.989</b> | <b>1</b>     | <b>CC/TT</b> |  |
|         |                                                                  | intron       | NCI              | rs9891129        | 56630474        | C T | 0.282 | 0.74 (0.63-0.87)        | 2.59E-04        |               |           | T | 0.3272  |              |              |              |  |
|         |                                                                  |              | UPENN            | rs302867         | 56752819        | T C | 0.336 | 0.78 (0.65-0.93)        | 6.93E-03        |               |           | C | 0.3259  |              |              |              |  |
|         |                                                                  |              | <b>NCI+UPENN</b> |                  |                 |     |       | <b>0.76 (0.67-0.85)</b> | <b>6.30E-06</b> | <b>0.7010</b> | <b>22</b> |   |         | <b>0.994</b> | <b>1</b>     | <b>TC/CT</b> |  |
|         |                                                                  | intron       | NCI              | rs9905704        | 56632543        | T G | 0.281 | 0.73 (0.62-0.86)        | 1.88E-04        |               |           | G | 0.3272  |              |              |              |  |
|         |                                                                  |              | UPENN            | rs302868         | 56752123        | C T | 0.337 | 0.77 (0.64-0.93)        | 5.46E-03        |               |           | T | 0.3259  |              |              |              |  |
|         |                                                                  |              | <b>NCI+UPENN</b> |                  |                 |     |       | <b>0.75 (0.66-0.85)</b> | <b>3.66E-06</b> | <b>0.7231</b> | <b>14</b> |   |         | <b>0.994</b> | <b>1</b>     | <b>GT/TC</b> |  |
|         |                                                                  | intron       | NCI              | rs1267543        | 56656624        | G A | 0.184 | 0.7 (0.58-0.84)         | 1.81E-04        |               |           | A | 0.2375  |              |              |              |  |
|         |                                                                  | intron       | UPENN            | rs2003537        | 56611871        | G C | 0.211 | 0.82 (0.67-1.02)        | 0.0701          |               |           | G | 0.2137  |              |              |              |  |
|         |                                                                  |              | <b>NCI+UPENN</b> |                  |                 |     |       | <b>0.75 (0.65-0.86)</b> | <b>6.57E-05</b> | <b>0.2665</b> | <b>34</b> |   |         | <b>0.858</b> | <b>0.992</b> | <b>AG/GC</b> |  |
|         |                                                                  | intron       | NCI              | rs302858         | 56692800        | C A | 0.282 | 0.74 (0.63-0.87)        | 2.77E-04        |               |           | T | 0.3259  |              |              |              |  |
|         |                                                                  | intron       | UPENN            | rs302868         | 56752123        | C T | 0.337 | 0.77 (0.64-0.93)        | 5.46E-03        |               |           | T | 0.3259  |              |              |              |  |
|         |                                                                  |              | <b>NCI+UPENN</b> |                  |                 |     |       | <b>0.75 (0.67-0.85)</b> | <b>5.21E-06</b> | <b>0.7736</b> | <b>18</b> |   |         | <b>1</b>     | <b>1</b>     | <b>TT/GC</b> |  |
|         |                                                                  | intron       | NCI              | rs304283         | 56785725        | C T | 0.281 | 0.74 (0.63-0.87)        | 2.72E-04        |               |           | T | 0.3245  |              |              |              |  |
| 17q22   | <i>C17orf47</i><br><i>TEX14</i><br><i>RAD51C</i><br><i>PPM1E</i> | intron       | UPENN            | rs302868         | 56752123        | C T | 0.337 | 0.77 (0.64-0.93)        | 5.46E-03        |               |           | T | 0.3259  |              |              |              |  |
|         |                                                                  |              | <b>NCI+UPENN</b> |                  |                 |     |       | <b>0.75 (0.67-0.85)</b> | <b>5.11E-06</b> | <b>0.7719</b> | <b>17</b> |   |         | <b>0.994</b> | <b>1</b>     | <b>TT/CC</b> |  |

|         |                                                                  |              |                  |                  |                 |     |       |                         |                 |               |           |   |         |              |              |              |  |
|---------|------------------------------------------------------------------|--------------|------------------|------------------|-----------------|-----|-------|-------------------------|-----------------|---------------|-----------|---|---------|--------------|--------------|--------------|--|
|         |                                                                  | intron       | UPENN            | rs10224497       | 2149967         | A G | 0.443 | 1.42 (1.19-1.69)        | 8.89E-05        |               |           | G | 0.4261  |              |              |              |  |
|         |                                                                  |              | <b>NCI+UPENN</b> |                  |                 |     |       | <b>1.38 (1.23-1.55)</b> | <b>3.66E-08</b> | <b>0.6662</b> | <b>2</b>  |   |         | <b>0.921</b> | <b>0.983</b> | <b>GG/AA</b> |  |
|         |                                                                  | intron       | NCI              | rs10256077       | 2171450         | T C | 0.493 | 1.31 (1.13-1.52)        | 4.28E-04        |               |           | C | 0.4314  |              |              |              |  |
|         |                                                                  | intron       | UPENN            | rs10224497       | 2149967         | A G | 0.443 | 1.42 (1.19-1.69)        | 8.89E-05        |               |           | G | 0.4261  |              |              |              |  |
|         |                                                                  |              | <b>NCI+UPENN</b> |                  |                 |     |       | <b>1.36 (1.21-1.52)</b> | <b>1.83E-07</b> | <b>0.4865</b> | <b>9</b>  |   |         | <b>0.894</b> | <b>0.956</b> | <b>CG/TA</b> |  |
|         |                                                                  | intron       | NCI              | rs3778991        | 2172455         | G A | 0.425 | 1.38 (1.18-1.61)        | 4.76E-05        |               |           | A | 0.3628  |              |              |              |  |
|         |                                                                  | intron       | UPENN            | rs3779003        | 2184902         | C T | 0.365 | 1.43 (1.19-1.71)        | 1.02E-04        |               |           | T | 0.3641  |              |              |              |  |
|         |                                                                  |              | <b>NCI+UPENN</b> |                  |                 |     |       | <b>1.4 (1.24-1.57)</b>  | <b>2.10E-08</b> | <b>0.7661</b> | <b>1</b>  |   |         | <b>0.983</b> | <b>0.994</b> | <b>AT/GC</b> |  |
|         |                                                                  | intron       | NCI              | rs3778994        | 2175855         | C A | 0.454 | 1.33 (1.14-1.55)        | 1.96E-04        |               |           |   |         |              |              |              |  |
|         |                                                                  |              | UPENN            | rs3778994        | 2175855         | G T | 0.409 | 1.35 (1.14-1.60)        | 6.22E-04        |               |           |   |         |              |              |              |  |
|         |                                                                  |              | <b>NCI+UPENN</b> | <b>rs3778994</b> | <b>2175855</b>  |     |       | <b>1.34 (1.20-1.50)</b> | <b>4.40E-07</b> | <b>0.8947</b> | <b>11</b> |   |         |              |              |              |  |
|         |                                                                  | intron       | NCI              | rs3800924        | 2188249         | C T | 0.359 | 1.35 (1.15-1.58)        | 2.38E-04        |               |           | T | 0.3285  |              |              |              |  |
|         |                                                                  | intron       | UPENN            | rs4721441        | 2184060         | A G | 0.389 | 1.28 (1.07-1.53)        | 5.92E-03        |               |           | C | 0.3641  |              |              |              |  |
|         |                                                                  |              | <b>NCI+UPENN</b> |                  |                 |     |       | <b>1.32 (1.17-1.49)</b> | <b>4.98E-06</b> | <b>0.6909</b> | <b>16</b> |   |         | <b>0.821</b> | <b>0.98</b>  | <b>TC/CT</b> |  |
|         |                                                                  |              | NCI              | rs7204293        | 50028105        | G A | 0.05  | 0.54 (0.40-0.75)        | 1.59E-04        |               |           | A | 0.05805 |              |              |              |  |
|         |                                                                  |              | UPENN            | rs12445755       | 50034945        | A G | 0.073 | 0.6 (0.41-0.88)         | 9.75E-03        |               |           | C | 0.06992 |              |              |              |  |
|         |                                                                  |              | <b>NCI+UPENN</b> |                  |                 |     |       | <b>0.57 (0.44-0.72)</b> | <b>6.11E-06</b> | <b>0.7060</b> | <b>21</b> |   |         | <b>0.78</b>  | <b>0.975</b> | <b>AC/GT</b> |  |
| 16q12.1 | <i>HEATR3</i><br><i>AF086132</i>                                 | intron       | NCI              | rs8046148        | 50142944        | G A | 0.177 | 0.7 (0.58-0.85)         | 2.12E-04        |               |           | A | 0.1926  |              |              |              |  |
|         |                                                                  |              | UPENN            | rs2058813        | 50129454        | C T | 0.191 | 0.82 (0.65-1.03)        | 0.0923          |               |           | T | 0.1715  |              |              |              |  |
|         |                                                                  |              | <b>NCI+UPENN</b> |                  |                 |     |       | <b>0.75 (0.65-0.86)</b> | <b>8.93E-05</b> | <b>0.2997</b> | <b>42</b> |   |         | <b>0.868</b> | <b>1</b>     | <b>AT/GC</b> |  |
|         |                                                                  |              | NCI              | rs1496430        | 51096349        | C T | 0.243 | 1.44 (1.19-1.74)        | 1.32E-04        |               |           | T | 0.1715  |              |              |              |  |
|         |                                                                  |              | UPENN            | rs1566043        | 51113337        | G A | 0.147 | 1.2 (0.94-1.54)         | 0.1411          |               |           | A | 0.1319  |              |              |              |  |
|         |                                                                  |              | <b>NCI+UPENN</b> |                  |                 |     |       | <b>1.35 (1.16-1.56)</b> | <b>9.08E-05</b> | <b>0.2493</b> | <b>43</b> |   |         | <b>0.734</b> | <b>1</b>     | <b>TA/CG</b> |  |
|         |                                                                  | missense     | NCI              | rs7193541        | 74664743        | T C | 0.359 | 0.76 (0.65-0.88)        | 4.24E-04        |               |           |   |         |              |              |              |  |
|         |                                                                  | lle>Val      | UPENN            | rs7193541        | 74664743        | T C | 0.396 | 0.83 (0.69-1.00)        | 0.0503          |               |           |   |         |              |              |              |  |
|         |                                                                  |              | <b>NCI+UPENN</b> | <b>rs7193541</b> | <b>74664743</b> |     |       | <b>0.79 (0.70-0.89)</b> | <b>7.86E-05</b> | <b>0.4414</b> | <b>37</b> |   |         |              |              |              |  |
|         |                                                                  | coding-synon | NCI              | rs4888262        | 74670458        | T C | 0.552 | 1.36 (1.16-1.58)        | 9.12E-05        |               |           |   |         |              |              |              |  |
|         |                                                                  | Thr>Thr      | UPENN            | rs4888262        | 74670458        | T C | 0.498 | 1.39 (1.16-1.67)        | 3.12E-04        |               |           |   |         |              |              |              |  |
|         |                                                                  |              | <b>NCI+UPENN</b> | <b>rs4888262</b> | <b>74670458</b> |     |       | <b>1.37 (1.22-1.54)</b> | <b>1.12E-07</b> | <b>0.8255</b> | <b>7</b>  |   |         |              |              |              |  |
|         |                                                                  | intron       | NCI              | rs4888265        | 74683737        | C T | 0.553 | 1.35 (1.16-1.57)        | 1.26E-04        |               |           | C | 0.4789  |              |              |              |  |
|         |                                                                  | intron       | UPENN            | rs8062783        | 74691264        | C T | 0.482 | 1.31 (1.09-1.57)        | 3.35E-03        |               |           | C | 0.4763  |              |              |              |  |
|         |                                                                  |              | <b>NCI+UPENN</b> |                  |                 |     |       | <b>1.33 (1.19-1.50)</b> | <b>1.51E-06</b> | <b>0.8069</b> | <b>13</b> |   |         | <b>0.989</b> | <b>1</b>     | <b>CC/TT</b> |  |
|         |                                                                  | intron       | NCI              | rs9891129        | 56630474        | C T | 0.282 | 0.74 (0.63-0.87)        | 2.59E-04        |               |           | T | 0.3272  |              |              |              |  |
|         |                                                                  |              | UPENN            | rs302867         | 56752819        | T C | 0.336 | 0.78 (0.65-0.93)        | 6.93E-03        |               |           | C | 0.3259  |              |              |              |  |
|         |                                                                  |              | <b>NCI+UPENN</b> |                  |                 |     |       | <b>0.76 (0.67-0.85)</b> | <b>6.30E-06</b> | <b>0.7010</b> | <b>22</b> |   |         | <b>0.994</b> | <b>1</b>     | <b>TC/CT</b> |  |
|         |                                                                  | intron       | NCI              | rs9905704        | 56632543        | T G | 0.281 | 0.73 (0.62-0.86)        | 1.88E-04        |               |           | G | 0.3272  |              |              |              |  |
|         |                                                                  |              | UPENN            | rs302868         | 56752123        | C T | 0.337 | 0.77 (0.64-0.93)        | 5.46E-03        |               |           | T | 0.3259  |              |              |              |  |
|         |                                                                  |              | <b>NCI+UPENN</b> |                  |                 |     |       | <b>0.75 (0.66-0.85)</b> | <b>3.66E-06</b> | <b>0.7231</b> | <b>14</b> |   |         | <b>0.994</b> | <b>1</b>     | <b>GT/TC</b> |  |
|         |                                                                  | intron       | NCI              | rs1267543        | 56656624        | G A | 0.184 | 0.7 (0.58-0.84)         | 1.81E-04        |               |           | A | 0.2375  |              |              |              |  |
|         |                                                                  | intron       | UPENN            | rs2003537        | 56611871        | G C | 0.211 | 0.82 (0.67-1.02)        | 0.0701          |               |           | G | 0.2137  |              |              |              |  |
|         |                                                                  |              | <b>NCI+UPENN</b> |                  |                 |     |       | <b>0.75 (0.65-0.86)</b> | <b>6.57E-05</b> | <b>0.2665</b> | <b>34</b> |   |         | <b>0.858</b> | <b>0.992</b> | <b>AG/GC</b> |  |
|         |                                                                  | intron       | NCI              | rs302858         | 56692800        | C A | 0.282 | 0.74 (0.63-0.87)        | 2.77E-04        |               |           | T | 0.3259  |              |              |              |  |
|         |                                                                  | intron       | UPENN            | rs302868         | 56752123        | C T | 0.337 | 0.77 (0.64-0.93)        | 5.46E-03        |               |           | T | 0.3259  |              |              |              |  |
|         |                                                                  |              | <b>NCI+UPENN</b> |                  |                 |     |       | <b>0.75 (0.67-0.85)</b> | <b>5.21E-06</b> | <b>0.7736</b> | <b>18</b> |   |         | <b>1</b>     | <b>1</b>     | <b>TT/GC</b> |  |
|         |                                                                  | intron       | NCI              | rs304283         | 56785725        | C T | 0.281 | 0.74 (0.63-0.87)        | 2.72E-04        |               |           | T | 0.3245  |              |              |              |  |
| 17q22   | <i>C17orf47</i><br><i>TEX14</i><br><i>RAD51C</i><br><i>PPM1E</i> | intron       | UPENN            | rs302868         | 56752123        | C T | 0.337 | 0.77 (0.64-0.93)        | 5.46E-03        |               |           | T | 0.3259  |              |              |              |  |
|         |                                                                  |              | <b>NCI+UPENN</b> |                  |                 |     |       | <b>0.75 (0.67-0.85)</b> | <b>5.11E-06</b> | <b>0.7719</b> | <b>17</b> |   |         | <b>0.994</b> | <b>1</b>     | <b>TT/CC</b> |  |

|         |                  |                  |            |          |       |                         |                         |                 |               |           |              |              |              |              |  |
|---------|------------------|------------------|------------|----------|-------|-------------------------|-------------------------|-----------------|---------------|-----------|--------------|--------------|--------------|--------------|--|
| TRIM37  | intron           | NCI              | rs304271   | 56802458 | G A   | 0.282                   | 0.75 (0.63-0.88)        | 3.78E-04        |               | T         | 0.3259       |              |              |              |  |
|         | intron           | UPENN            | rs302868   | 56752123 | C T   | 0.337                   | 0.77 (0.64-0.93)        | 5.46E-03        |               | T         | 0.3259       |              |              |              |  |
|         |                  | <b>NCI+UPENN</b> |            |          |       |                         | <b>0.76 (0.67-0.85)</b> | <b>6.89E-06</b> | <b>0.8132</b> | <b>23</b> |              | <b>1</b>     | <b>1</b>     | <b>TT/CC</b> |  |
|         | intron           | NCI              | rs304272   | 56803028 | G T   | 0.282                   | 0.74 (0.63-0.87)        | 3.17E-04        |               | A         | 0.3259       |              |              |              |  |
|         | intron           | UPENN            | rs302868   | 56752123 | C T   | 0.337                   | 0.77 (0.64-0.93)        | 5.46E-03        |               | T         | 0.3259       |              |              |              |  |
|         |                  | <b>NCI+UPENN</b> |            |          |       |                         | <b>0.75 (0.67-0.85)</b> | <b>5.89E-06</b> | <b>0.7917</b> | <b>20</b> |              | <b>1</b>     | <b>1</b>     | <b>AT/CC</b> |  |
|         | intron           | NCI              | rs7221274  | 57008128 | A G   | 0.34                    | 0.72 (0.62-0.84)        | 3.56E-05        |               | G         | 0.405        |              |              |              |  |
|         | intron           | UPENN            | rs9898048  | 57108543 | C T   | 0.402                   | 0.84 (0.70-1.00)        | 0.0527          |               | A         | 0.4063       |              |              |              |  |
|         |                  | <b>NCI+UPENN</b> |            |          |       |                         | <b>0.77 (0.69-0.87)</b> | <b>1.22E-05</b> | <b>0.2132</b> | <b>25</b> |              | <b>0.962</b> | <b>0.983</b> | <b>GA/AG</b> |  |
|         | intron           | NCI              | rs11869052 | 57143404 | T G   | 0.34                    | 0.74 (0.63-0.86)        | 1.20E-04        |               | G         | 0.4063       |              |              |              |  |
|         | intron           | UPENN            | rs9898048  | 57108543 | C T   | 0.402                   | 0.84 (0.70-1.00)        | 0.0527          |               | A         | 0.4063       |              |              |              |  |
|         |                  | <b>NCI+UPENN</b> |            |          |       |                         | <b>0.78 (0.69-0.88)</b> | <b>3.18E-05</b> | <b>0.2856</b> | <b>27</b> |              | <b>1</b>     | <b>1</b>     | <b>GA/TG</b> |  |
| 18q12.1 |                  | NCI              | rs1482516  | 29331752 | G T   | 0.313                   | 0.74 (0.63-0.87)        | 2.72E-04        |               | T         | 0.343        |              |              |              |  |
|         |                  | UPENN            | rs4799597  | 29326919 | A C   | 0.350                   | 0.83 (0.69-1.01)        | 0.0616          |               | G         | 0.3404       |              |              |              |  |
|         |                  | <b>NCI+UPENN</b> |            |          |       |                         | <b>0.78 (0.69-0.88)</b> | <b>6.79E-05</b> | <b>0.3775</b> | <b>35</b> |              | <b>0.977</b> | <b>0.994</b> | <b>TG/GT</b> |  |
| 18q21.1 | intron           | NCI              | rs7232791  | 46717796 | T C   | 0.119                   | 0.67 (0.54-0.84)        | 3.45E-04        |               | C         | 0.153        |              |              |              |  |
|         | intron           | UPENN            | rs357897   | 46584184 | T C   | 0.159                   | 0.75 (0.58-0.97)        | 0.0275          |               | C         | 0.1425       |              |              |              |  |
|         |                  | <b>NCI+UPENN</b> |            |          |       |                         | <b>0.7 (0.60-0.83)</b>  | <b>3.55E-05</b> | <b>0.5227</b> | <b>28</b> |              | <b>0.879</b> | <b>0.978</b> | <b>CC/TT</b> |  |
|         | intron           | NCI              | rs12458268 | 46928736 | C T   | 0.051                   | 0.54 (0.39-0.74)        | 9.88E-05        |               | T         | 0.09103      |              |              |              |  |
|         | intron           | UPENN            | rs3794825  | 46806580 | T C   | 0.079                   | 0.75 (0.53-1.07)        | 0.1130          |               | G         | 0.08971      |              |              |              |  |
|         |                  | <b>NCI+UPENN</b> |            |          |       |                         | <b>0.62 (0.49-0.79)</b> | <b>8.78E-05</b> | <b>0.1730</b> | <b>40</b> |              | <b>0.984</b> | <b>1</b>     | <b>TG/CA</b> |  |
|         | intron           | NCI              | rs12456319 | 46943301 | G A   | 0.052                   | 0.54 (0.39-0.74)        | 1.01E-04        |               | A         | 0.08839      |              |              |              |  |
|         | intron           | UPENN            | rs3794825  | 46806580 | T C   | 0.079                   | 0.75 (0.53-1.07)        | 0.1130          |               | G         | 0.08971      |              |              |              |  |
|         |                  | <b>NCI+UPENN</b> |            |          |       |                         | <b>0.62 (0.49-0.79)</b> | <b>8.91E-05</b> | <b>0.1740</b> | <b>41</b> |              | <b>0.952</b> | <b>0.984</b> | <b>AG/GA</b> |  |
|         | intron           | NCI              | rs2276269  | 47102002 | C T   | 0.458                   | 1.34 (1.15-1.56)        | 1.31E-04        |               | T         | 0.4499       |              |              |              |  |
|         | intron           | UPENN            | rs3786249  | 47097489 | A G   | 0.497                   | 1.18 (0.99-1.41)        | 0.0696          |               | T         | 0.4815       |              |              |              |  |
|         |                  | <b>NCI+UPENN</b> |            |          |       |                         | <b>1.27 (1.13-1.43)</b> | <b>4.43E-05</b> | <b>0.2827</b> | <b>32</b> |              | <b>0.73</b>  | <b>0.981</b> | <b>TC/CT</b> |  |
| intron  | NCI              | rs9951026        | 47109693   | A G      | 0.525 | 1.34 (1.15-1.56)        | 1.18E-04                |                 | A             | 0.4855    |              |              |              |              |  |
| intron  | UPENN            | rs3786249        | 47097489   | A G      | 0.497 | 1.18 (0.99-1.41)        | 0.0696                  |                 | T             | 0.4815    |              |              |              |              |  |
|         | <b>NCI+UPENN</b> |                  |            |          |       | <b>1.27 (1.13-1.43)</b> | <b>3.95E-05</b>         | <b>0.2854</b>   | <b>31</b>     |           | <b>0.942</b> | <b>0.979</b> | <b>AT/GC</b> |              |  |

**Supplementary Table 3** Description of the cohorts in TGCT meta-analysis

| Label                 | Study                                                                               | Design    | Genotyping                                     | Case         | Control      |
|-----------------------|-------------------------------------------------------------------------------------|-----------|------------------------------------------------|--------------|--------------|
| STEED                 | The US Servicemen's Testicular Tumor Environmental and Endocrine Determinants Study | GWAS      | Illumina 660K                                  | 479          | 555          |
| FTCS                  | The NCI's Familial Testicular Cancer Study                                          | GWAS      | Illumina 660K                                  | 103          | 501          |
| UPENN                 | University of Pennsylvania Health System/Fox Chase Cancer Center                    | GWAS      | Affymetrix 6.0                                 | 349          | 919          |
| <b>Discovery Meta</b> |                                                                                     |           |                                                | <b>931</b>   | <b>1,975</b> |
| UKTCC                 | UK Testicular Cancer Collaboration                                                  | GWAS      | Illumina HumanCNV370-Duo (case)/1.2M (control) | 979          | 4,947        |
| USC                   | University of Southern California                                                   | GWAS      | Illumina 610K                                  | 358          | 258          |
| TestPAC               | The Testicular Cancer in Philadelphia Area Counties                                 | follow-up | iPLEX Mass Array platform                      | 331          | 683          |
| ATLAS                 | The Adult Testicular Lifestyle and Blood Specimen Study                             | follow-up | iPLEX Mass Array platform                      | 439          | 960          |
| OUHRH                 | Oslo University Hospital-Radium Hospital, Norway                                    | follow-up | TaqMan                                         | 865          | 392          |
| MDA                   | M.D. Anderson Cancer Center                                                         | follow-up | TaqMan                                         | 239          | 351          |
| <b>Replication</b>    |                                                                                     |           |                                                | <b>3,211</b> | <b>7,591</b> |
| <b>Total</b>          |                                                                                     |           |                                                | <b>4,142</b> | <b>9,566</b> |

**Supplementary Table 4** Meta-analysis results for 17 SNPs in association with TGCT

| Gene nearby                | cytoband | SNP        |     |       |     |       |       |         |       |     |        | Final Meta-analysis results for 17 SNPs |         |            |              |             |                     |          |
|----------------------------|----------|------------|-----|-------|-----|-------|-------|---------|-------|-----|--------|-----------------------------------------|---------|------------|--------------|-------------|---------------------|----------|
|                            |          |            | NCI | UPENN | USC | UKTCC | ATLAS | TestPAC | OUHRH | MDA | #study | case                                    | control | Allelic OR | 95% CI (L-U) | P value     | P for heterogeneity |          |
| <i>C17orf47,TEX14</i>      | 17q22    | rs9905704  | ●   | ○     | ●   | ●     | ●     | ●       | ●     | ●   | ●      | 8                                       | 3,863   | 9,152      | 1.27         | (1.18-1.33) | 4.32E-13            | 0.6678   |
| <i>PPM1E</i>               | 17q22    | rs7221274  | ●   | ○     | ●   | ●     | ●     | ●       | ●     | ●   | ●      | 8                                       | 3,829   | 9,120      | 1.20         | (1.12-1.28) | 4.04E-09            | 0.1303   |
| <i>MAD1L1</i>              | 7p22.3   | rs12699477 | ●   | ○     | ●   | ●     | ●     | ●       | ●     | ●   | ●      | 6                                       | 2,832   | 8,424      | 1.21         | (1.14-1.29) | 5.59E-09            | 0.3177   |
| <i>RFWD3</i>               | 16q22.3  | rs4888262  | ●   | ●     | ●   | ○     | ●     | ●       | ●     | ●   | ●      | 5                                       | 2,801   | 8,393      | 1.26         | (1.18-1.34) | 5.15E-12            | 0.3968   |
| <i>HPGDS</i>               | 4q22.2   | rs17021463 | ●   | ○     | ●   | ●     | ●     | ●       | ●     | ●   | ●      | 8                                       | 3,866   | 9,146      | 1.19         | (1.12-1.26) | 1.11E-08            | 0.5827   |
| <i>MAD1L1</i>              | 7p22.3   | rs10275045 | ●   | ●     | ●   | ○     | ●     | ●       | ●     | ●   | ●      | 7                                       | 3,839   | 9,080      | 1.20         | (1.13-1.27) | 3.78E-10            | 0.0016   |
| <i>MAD1L1</i>              | 7p22.3   | rs3778991  | ●   | ○     | ●   | ○     | ●     | ●       | ●     | ●   | ●      | 7                                       | 3,839   | 9,123      | 1.21         | (1.14-1.28) | 6.73E-10            | 0.0037   |
| <i>TEX14</i>               | 17q22    | rs1267543  | ●   | ○     | ●   | ○     | ●     | ●       | ●     | ●   | ●      | 5                                       | 2,852   | 8,432      | 0.82         | (0.76-0.89) | 5.05E-07            | 0.3924   |
| <i>HEATR3</i>              | 16q12.1  | rs8046148  | ●   | ○     | ●   | ●     | ●     | ●       | ●     | ●   | ●      | 7                                       | 3,060   | 8,770      | 0.83         | (0.77-0.90) | 2.55E-06            | 2.45E-04 |
| <i>LIPG</i>                | 18q21.1  | rs9951026  | ●   | ○     | ●   | ●     | ●     | ●       | ●     | ●   | ●      | 5                                       | 1,845   | 3,459      | 1.22         | (1.12-1.33) | 4.66E-06            | 0.6348   |
|                            | 16q12.1  | rs7204293  | ●   | ○     | ●   | ●     | ●     | ●       | ●     | ●   | ●      | 6                                       | 2,850   | 8,428      | 0.78         | (0.69-0.87) | 1.42E-05            | 0.0792   |
| <i>MRPL42P3</i>            | 6q24.2   | rs7760281  | ●   | ●     | ●   | ●     | ●     | ●       | ●     | ●   | ●      | 6                                       | 2,836   | 8,426      | 1.12         | (1.05-1.19) | 7.98E-04            | 0.0791   |
| <i>DYM</i>                 | 18q21.1  | rs7232791  | ●   | ○     | ●   | ●     | ●     | ●       | ●     | ●   | ●      | 6                                       | 2,831   | 8,407      | 0.92         | (0.84-1.00) | 0.0478              | 0.0060   |
|                            | 3p26.1   | rs9811958  | ●   | ○     | ●   | ●     | ●     | ●       | ●     | ●   | ●      | 6                                       | 2,832   | 8,398      | 1.06         | (1.00-1.14) | 0.0550              | 0.0012   |
|                            | 16q12.1  | rs1496430  | ●   | ○     | ●   | ●     | ●     | ●       | ●     | ●   | ●      | 6                                       | 2,708   | 8,180      | 1.08         | (1.00-1.17) | 0.0569              | 0.0199   |
| <i>MCART2</i>              | 18q12.1  | rs1482516  | ●   | ○     | ●   | ●     | ●     | ●       | ●     | ●   | ●      | 6                                       | 2,830   | 8,409      | 0.94         | (0.88-1.00) | 0.0697              | 0.0082   |
| <i>DYM</i>                 | 18q21.1  | rs12458268 | ●   | ○     | ●   | ●     | ●     | ●       | ●     | ●   | ●      | 6                                       | 2,810   | 8,301      | 0.99         | (0.88-1.10) | 0.8069              | 3.89E-07 |
| # data available per study |          |            | 17  | 17    | 17  | 16    | 17    | 17      | 5     | 6   |        |                                         |         |            |              |             |                     |          |

open circle depicts indirect meta-analysis using surrogate and solid circle depicts direct match of SNP



|    |          |      |            |        |        |      |      |      |  |               |                  |                  |                     |          |            |    |
|----|----------|------|------------|--------|--------|------|------|------|--|---------------|------------------|------------------|---------------------|----------|------------|----|
| 4  | 95224812 | 1.00 | rs17021463 | T      | G      | 0.72 | 0.59 | 0.41 |  | 8 cell types  |                  | HPGDS            | intronic            | 5        |            |    |
| 4  | 95229039 | 0.90 | rs2016483  | A      | T      | 0.7  | 0.57 | 0.36 |  |               |                  | Prrx2            | HPGDS               | intronic | 5          |    |
| 4  | 95237611 | 0.84 | 4:95456634 | A      | 12-mer | 0    | 0.3  | 0.44 |  |               |                  | Pou2f1           | HPGDS               | intronic | NA         |    |
| 4  | 95239783 | 0.90 | rs36099342 | T      | C      | 0.3  | 0.43 | 0.03 |  |               |                  | Pou2f1           | HPGDS               | intronic | 7          |    |
| 4  | 95245527 | 0.90 | rs13102926 | C      | T      | 0.3  | 0.43 | 0.03 |  |               |                  | EWSR1-FLI1       | HPGDS               | intronic | 7          |    |
| 4  | 95248721 | 0.90 | rs62320439 | G      | C      | 0.3  | 0.43 | 0.08 |  |               |                  |                  | HPGDS               | intronic | 7          |    |
| 4  | 95249286 | 0.90 | rs11097413 | C      | T      | 0.3  | 0.43 | 0.55 |  |               |                  | PPARG,PPAR       | HPGDS               | intronic | 6          |    |
| 4  | 95253263 | 0.90 | rs2865352  | G      | A      | 0.3  | 0.43 | 0.6  |  |               |                  |                  | HPGDS               | intronic | 6          |    |
| 4  | 95254730 | 0.90 | rs10516950 | G      | A      | 0.3  | 0.43 | 0.37 |  | SP1           |                  |                  | HPGDS               | intronic | 5          |    |
| 4  | 95256649 | 0.87 | rs35744894 | G      | A      | 0.19 | 0.38 | 0.01 |  |               |                  | DMRT2            | HPGDS               | intronic | 7          |    |
| 4  | 95257554 | 0.90 | rs34465979 | C      | A      | 0.3  | 0.43 | 0.43 |  |               |                  | Bcl6b,STAT       | HPGDS               | intronic | 6          |    |
| 4  | 95257753 | 0.87 | rs28403447 | G      | A      | 0.29 | 0.43 | 0.54 |  |               |                  | Foxp1,Foxj2,HNF1 | HPGDS               | intronic | 6          |    |
| 4  | 95268071 | 0.81 | rs11097417 | A      | G      | 0.3  | 0.44 | 0.26 |  |               |                  | 5 altered motifs | 4kb 5' of HPGDS     |          | 5          |    |
| 4  | 95268748 | 0.81 | rs10856909 | C      | G      | 0.3  | 0.44 | 0.2  |  |               |                  | Foxp1            | 4.7kb 5' of HPGDS   |          | 5          |    |
| 4  | 95275157 | 0.81 | rs34181160 | T      | G      | 0.28 | 0.44 | 0.19 |  |               |                  | GATA,Evi-1       | 11kb 5' of HPGDS    |          | 6          |    |
| 7  | 1968953  | 1.00 | rs12699477 | T      | C      | 0.44 | 0.29 | 0    |  | 16 cell types | ZNF263           |                  | MAD1L1              | intronic | 4          |    |
| 7  | 1966492  | 0.79 | rs10950448 | G      | C      | 0.44 | 0.35 | 0    |  | 22 cell types |                  |                  | MAD1L1              | intronic | 4          |    |
| 7  | 1923695  | 0.77 | rs11761270 | C      | T      | 0.38 | 0.34 | 0.01 |  | K562          | 32 cell types    | CTCF,GABP,RAD21  |                     | MAD1L1   | intronic   | 4  |
| 7  | 1935273  | 0.75 | rs11761818 | C      | T      | 0.38 | 0.33 | 0    |  | 7 cell types  |                  |                  | MAD1L1              | intronic | 5          |    |
| 7  | 1932151  | 0.75 | rs11768206 | T      | G      | 0.39 | 0.34 | 0    |  | 6 cell types  |                  |                  | Pou1f1,Pou3f2       | MAD1L1   | intronic   | 5  |
| 7  | 1945678  | 0.75 | rs11771451 | T      | C      | 0.38 | 0.34 | 0    |  |               |                  |                  | Foxm1               | MAD1L1   | intronic   | 6  |
| 7  | 1950440  | 0.75 | rs11771973 | C      | G      | 0.41 | 0.33 | 0    |  |               |                  |                  |                     | MAD1L1   | intronic   | 5  |
| 7  | 1953650  | 0.75 | rs12531315 | C      | G      | 0.41 | 0.33 | 0    |  | 16 cell types |                  |                  |                     | MAD1L1   | intronic   | 5  |
| 7  | 1925454  | 0.72 | rs12532128 | T      | C      | 0.38 | 0.34 | 0    |  | NHLF          | 24 cell types    |                  | KROX                | MAD1L1   | intronic   | 5  |
| 7  | 1958672  | 0.72 | rs12536062 | G      | A      | 0.4  | 0.33 | 0    |  | 14 cell types |                  |                  |                     | MAD1L1   | intronic   | 5  |
| 7  | 1953571  | 0.72 | rs12536261 | G      | A      | 0.41 | 0.33 | 0.01 |  | 29 cell types |                  |                  |                     | MAD1L1   | intronic   | 5  |
| 7  | 1948359  | 0.72 | rs12537914 | C      | T      | 0.41 | 0.33 | 0    |  | NHLF          | 27 cell types    |                  | Spz1                | MAD1L1   | intronic   | 5  |
| 7  | 1931030  | 0.72 | rs12667688 | C      | T      | 0    | 0.34 | 0    |  | 6 cell types  |                  |                  |                     | MAD1L1   | intronic   | 5  |
| 7  | 1939765  | 0.72 | rs12669937 | C      | T      | 0.38 | 0.33 | 0.01 |  |               |                  |                  | NRSF                | MAD1L1   | intronic   | 7  |
| 7  | 1965255  | 0.72 | rs12671113 | G      | A      | 0.42 | 0.34 | 0.01 |  | 22 cell types |                  |                  |                     | MAD1L1   | intronic   | 5  |
| 7  | 1975624  | 0.72 | rs12699483 | C      | G      | 0.44 | 0.34 | 0    |  | 28 cell types | 4 bound proteins |                  |                     | MAD1L1   | intronic   | 4  |
| 7  | 1953766  | 0.72 | rs13224989 | C      | G      | 0.41 | 0.33 | 0.01 |  | 20 cell types |                  |                  |                     | MAD1L1   | intronic   | 5  |
| 7  | 1976457  | 0.72 | rs1801368  | C      | T      | 0.44 | 0.34 | 0    |  | 21 cell types |                  |                  |                     | MAD1L1   | intronic   | 5  |
| 7  | 1953897  | 0.72 | rs2056478  | C      | T      | 0.38 | 0.33 | 0.01 |  | NHLF          | 17 cell types    | ERALPHA_A        | Nrf-1               | MAD1L1   | missense   | 2b |
| 7  | 1954301  | 0.72 | rs2056480  | G      | A      | 0.41 | 0.33 | 0    |  | 21 cell types |                  |                  |                     | MAD1L1   | intronic   | 5  |
| 7  | 1955435  | 0.72 | rs2056481  | A      | G      | 0.41 | 0.33 | 0    |  | 17 cell types |                  |                  |                     | MAD1L1   | intronic   | 5  |
| 7  | 1976863  | 0.71 | rs2280546  | G      | A      | 0.44 | 0.34 | 0    |  | 24 cell types |                  |                  |                     | MAD1L1   | intronic   | 5  |
| 7  | 1976667  | 0.71 | rs2280548  | G      | T      | 0.44 | 0.34 | 0.01 |  | 17 cell types |                  |                  |                     | MAD1L1   | intronic   | 5  |
| 7  | 1976556  | 0.71 | rs2280550  | G      | A      | 0.44 | 0.34 | 0    |  | 25 cell types | ERALPHA_A,CMYC   |                  |                     | MAD1L1   | intronic   | 3a |
| 7  | 1926237  | 0.71 | rs34145223 | G      | A      | 0.38 | 0.34 | 0    |  | 22 cell types | ERALPHA_A,CMYC   | Esr2,Esr1,YY1    |                     | MAD1L1   | intronic   | 2a |
| 7  | 1948712  | 0.71 | rs34269264 | C      | T      | 0.41 | 0.33 | 0.01 |  | 17 cell types |                  |                  | KROX                | MAD1L1   | intronic   | 5  |
| 7  | 1935245  | 0.71 | rs34296663 | C      | T      | 0.38 | 0.33 | 0    |  | 13 cell types | GATA2            | Spz1             |                     | MAD1L1   | intronic   | 2b |
| 7  | 1938655  | 0.71 | rs34922657 | C      | T      | 0.38 | 0.33 | 0    |  | 7 cell types  |                  |                  |                     | MAD1L1   | intronic   | 5  |
| 7  | 1948756  | 0.71 | rs35582663 | G      | A      | 0.41 | 0.33 | 0    |  | 24 cell types | NHLF             |                  | AP-2                | MAD1L1   | intronic   | 2b |
| 7  | 1954914  | 0.71 | rs35797753 | G      | A      | 0.41 | 0.31 | 0    |  | 14 cell types | GATA2            |                  |                     | MAD1L1   | intronic   | 4  |
| 7  | 1942270  | 0.71 | rs4236277  | C      | T      | 0.38 | 0.33 | 0    |  | 21 cell types |                  |                  | PU,1,Brachyury,GABP | MAD1L1   | intronic   | 5  |
| 7  | 1955152  | 0.71 | rs4421257  | T      | C      | 0.41 | 0.33 | 0.38 |  | 5 cell types  |                  |                  |                     | MAD1L1   | intronic   | 5  |
| 7  | 1977906  | 0.71 | rs4719366  | G      | A      | 0.35 | 0.34 | 0    |  | 13 cell types |                  |                  |                     | MAD1L1   | intronic   | 5  |
| 7  | 1933224  | 0.71 | rs4721167  | C      | T      | 0.35 | 0.33 | 0    |  | 9 cell types  | GM12878          | ERALPHA_A        | RREB-1              | MAD1L1   | intronic   | 2b |
| 7  | 1950784  | 0.71 | rs4721184  | T      | C      | 0.41 | 0.33 | 0.01 |  | 5 cell types  |                  |                  | PPARG,HNF4          | MAD1L1   | intronic   | 5  |
| 7  | 1973579  | 0.70 | rs4721217  | C      | T      | 0.45 | 0.34 | 0    |  | 19 cell types |                  |                  |                     | MAD1L1   | intronic   | 5  |
| 16 | 74657485 | 0.90 | rs8058133  | A      | T      | 0.83 | 0.47 | 0.82 |  | 17 cell types |                  |                  | AP-2                | MAD1L1   | intronic   | 5  |
| 16 | 74658867 | 0.90 | rs8052367  | G      | A      | 0.83 | 0.47 | 0.82 |  | 10 cell types | CTCF             |                  | RFWD3               | 3'-UTR   | 3a         |    |
| 16 | 74664810 | 0.97 | rs7188880  | A      | T      | 0.83 | 0.45 | 0.83 |  | RPEEC         |                  |                  |                     | RFWD3    | intronic   | 5  |
| 16 | 74668473 | 1.00 | rs9929496  | G      | A      | 0.83 | 0.46 | 0.83 |  |               |                  |                  | Smad3,AP-4          | RFWD3    | synonymous | 6  |
| 16 | 74670458 | 1.00 | rs4888262  | C      | T      | 0.83 | 0.46 | 0.82 |  |               |                  |                  | Mef2                | RFWD3    | intronic   | 6  |
| 16 | 74672900 | 0.84 | rs77736938 | C      | A      | 0.8  | 0.42 | 0.81 |  |               |                  |                  | CREB,Gmeb1,E4F1     | RFWD3    | synonymous | 6  |
| 16 | 74672901 | 0.84 | rs7188581  | T      | A      | 0.79 | 0.42 | 0.81 |  |               |                  |                  | 6 altered motifs    | RFWD3    | intronic   | NA |
| 16 | 74675367 | 0.93 | rs56032517 | GATTA  | G      | 0.73 | 0.21 | 0.62 |  |               |                  |                  | DMRT3,Mef2          | RFWD3    | intronic   | 6  |
| 16 | 74680801 | 0.93 | rs57231731 | 13-mer | T      | 0.68 | 0.33 | 0.73 |  |               |                  |                  | OTX                 | RFWD3    | intronic   | 6  |
|    |          |      |            |        |        |      |      |      |  |               |                  |                  | RFWD3               | intronic | NA         |    |





|    |          |      |             |        |       |      |      |      |      |  |  |  |                   |                    |                   |                   |                  |                    |          |          |   |
|----|----------|------|-------------|--------|-------|------|------|------|------|--|--|--|-------------------|--------------------|-------------------|-------------------|------------------|--------------------|----------|----------|---|
| 17 | 56794115 | 0.85 | rs2567894   | G      | A     | 0    | 0.29 | 0.23 |      |  |  |  | RAD51C            | intronic           | 7                 |                   |                  |                    |          |          |   |
| 17 | 56798207 | 0.85 | rs28363318  | T      | C     | 0    | 0.29 | 0.23 |      |  |  |  | RAD51C            | intronic           | 5                 |                   |                  |                    |          |          |   |
| 17 | 56799380 | 0.85 | rs304267    | A      | G     | 0    | 0.29 | 0.23 |      |  |  |  | RAD51C            | intronic           | 7                 |                   |                  |                    |          |          |   |
| 17 | 56799907 | 0.85 | rs304268    | T      | C     | 0    | 0.29 | 0.23 |      |  |  |  | Zbtb12            | intronic           | 6                 |                   |                  |                    |          |          |   |
| 17 | 56802059 | 0.81 | rs304269    | G      | A     | 0    | 0.3  | 0.23 |      |  |  |  | 7 altered motifs  | intronic           | 6                 |                   |                  |                    |          |          |   |
| 17 | 56802458 | 0.92 | rs304271    | C      | T     | 0    | 0.28 | 0.09 |      |  |  |  | RAD51C            | intronic           | 7                 |                   |                  |                    |          |          |   |
| 17 | 56803028 | 0.92 | rs304272    | C      | A     | 0    | 0.28 | 0.13 |      |  |  |  | RAD51C            | intronic           | 6                 |                   |                  |                    |          |          |   |
| 17 | 56804213 | 0.80 | 17:54159212 | GCT    | A     | 0    | 0.09 | 0.03 |      |  |  |  | RAD51C            |                    | NA                |                   |                  |                    |          |          |   |
| 17 | 56808530 | 0.92 | rs2611783   | A      | G     | 0    | 0.28 | 0.13 |      |  |  |  | 5 altered motifs  | intronic           | 6                 |                   |                  |                    |          |          |   |
| 17 | 56814456 | 0.85 | rs304262    | A      | G     | 0    | 0.29 | 0.23 |      |  |  |  | MIF-1             | 2.8kb 3' of RAD51C | 6                 |                   |                  |                    |          |          |   |
| 17 | 56823298 | 0.92 | rs304293    | T      | G     | 0    | 0.28 | 0    |      |  |  |  | Olf-1,LUN-1       | 9.9kb 5' of PPM1E  | 6                 |                   |                  |                    |          |          |   |
| 17 | 56826949 | 0.91 | rs2643120   | A      | T     | 0    | 0.26 | 0.14 |      |  |  |  |                   | 6.3kb 5' of PPM1E  | 7                 |                   |                  |                    |          |          |   |
| 17 | 56826953 | 0.83 | rs34556895  | G      | T     | 0    | 0.26 | 0.14 |      |  |  |  |                   | 6.3kb 5' of PPM1E  | 7                 |                   |                  |                    |          |          |   |
| 17 | 56826958 | 0.83 | rs2611777   | A      | G     | 0    | 0.26 | 0.14 |      |  |  |  | Hoxb13            | 6.3kb 5' of PPM1E  | 6                 |                   |                  |                    |          |          |   |
| 17 | 56829516 | 0.91 | rs2643117   | G      | A     | 0    | 0.26 | 0    |      |  |  |  | RREB-1,Foxp1      | 3.7kb 5' of PPM1E  | 5                 |                   |                  |                    |          |          |   |
| 17 | 56831887 | 0.84 | rs170024    | T      | C     | 0    | 0.28 | 0.2  |      |  |  |  | Pou2f1,Cart1      | 1.3kb 5' of PPM1E  | 5                 |                   |                  |                    |          |          |   |
| 17 | 56839689 | 0.85 | rs304298    | G      | A     | 0    | 0.29 | 0.23 |      |  |  |  | PPM1E             |                    | 7                 |                   |                  |                    |          |          |   |
| 17 | 56842043 | 0.92 | rs11657676  | A      | G     | 0    | 0.28 | 0.02 |      |  |  |  | HRCepiC,HRE,RPTEC | PAX5C20,PAX5N19    | ZID               | PPM1E             | intronic         | 3a                 |          |          |   |
| 17 | 56844109 | 0.88 | rs28483505  | G      | C     | 0    | 0.27 | 0    |      |  |  |  |                   | PPM1E              |                   | intronic          | 6                |                    |          |          |   |
| 17 | 56848677 | 0.83 | rs12939500  | T      | C     | 0    | 0.26 | 0.14 |      |  |  |  |                   | Foxl1              | PPM1E             | intronic          | 6                |                    |          |          |   |
| 17 | 56854517 | 0.92 | rs11655808  | T      | C     | 0    | 0.28 | 0.02 |      |  |  |  | CMYC,CTCF         | PPM1E              | intronic          | 5                 |                  |                    |          |          |   |
| 17 | 56861253 | 0.88 | rs12942879  | G      | A     | 0    | 0.28 | 0.11 |      |  |  |  |                   | PPM1E              |                   | intronic          | 7                |                    |          |          |   |
| 17 | 56863336 | 0.92 | 17:54218335 | A      | AT    | 0    | 0.09 | 0.05 |      |  |  |  |                   | PPM1E              |                   | intronic          | NA               |                    |          |          |   |
| 17 | 56863918 | 0.85 | rs7212271   | C      | T     | 0    | 0.29 | 0.22 |      |  |  |  |                   | PPM1E              |                   | intronic          | 4                |                    |          |          |   |
| 17 | 56864242 | 0.85 | rs11079356  | C      | A     | 0    | 0.29 | 0.23 |      |  |  |  |                   | SK-N-SH_RA         | CEBPB             |                   |                  |                    |          |          |   |
| 17 | 56876627 | 0.92 | rs34430710  | A      | T     | 0    | 0.28 | 0.14 |      |  |  |  |                   | 80 cell types      | 23 bound proteins |                   |                  |                    |          |          |   |
| 17 | 56883236 | 0.92 | rs72828707  | A      | G     | 0    | 0.28 | 0.14 |      |  |  |  |                   | AoSMC,Huh-7.5      |                   |                   |                  |                    |          |          |   |
| 17 | 56887394 | 0.92 | rs34694297  | CT     | C     | 0    | 0.19 | 0.08 |      |  |  |  |                   |                    | Pou3f3,Foxj2      | PPM1E             | intronic         | 5                  |          |          |   |
| 17 | 56892872 | 0.92 | rs12942969  | A      | T     | 0    | 0.28 | 0.08 |      |  |  |  |                   |                    | 10 altered motifs | PPM1E             | intronic         | 6                  |          |          |   |
| 17 | 56894638 | 0.92 | rs35934668  | A      | G     | 0    | 0.28 | 0.01 |      |  |  |  |                   |                    | PPM1E             |                   | intronic         | 7                  |          |          |   |
| 17 | 56900870 | 0.92 | rs12952362  | A      | G     | 0    | 0.28 | 0.14 |      |  |  |  |                   |                    | PPM1E             |                   | intronic         | 6                  |          |          |   |
| 17 | 56902444 | 0.92 | rs12947196  | G      | A     | 0    | 0.28 | 0.12 |      |  |  |  |                   |                    | Bcl6b             | PPM1E             | intronic         | 6                  |          |          |   |
| 17 | 56914643 | 0.80 | rs57058929  | AG     | A     | 0    | 0.32 | 0.09 |      |  |  |  |                   |                    | Pou3f3            | PPM1E             | intronic         | 6                  |          |          |   |
| 17 | 56914687 | 0.85 | 17:54269469 | C      | CAT   | 0    | 0.16 | 0.25 |      |  |  |  |                   |                    | SREBP             | PPM1E             | intronic         | 5                  |          |          |   |
| 17 | 56916804 | 0.92 | rs36071323  | C      | T     | 0    | 0.28 | 0.13 |      |  |  |  |                   |                    | 5 altered motifs  | PPM1E             | intronic         | 7                  |          |          |   |
| 17 | 56919549 | 0.92 | rs11650343  | G      | A     | 0    | 0.28 | 0.02 |      |  |  |  |                   |                    | PPM1E             |                   | intronic         | 6                  |          |          |   |
| 17 | 56943950 | 0.92 | rs57543170  | 16-mer | A     | C    | 0    | 0.15 | 0.15 |  |  |  |                   |                    | MCF-7             | PPM1E             | intronic         | NA                 |          |          |   |
| 17 | 56647528 | 0.86 | rs11289066  | CA     | C     | 0.66 | 0.73 | 0.14 |      |  |  |  |                   |                    | Zfp105,Pou2f1     | TEX14             | intronic         | 6                  |          |          |   |
| 17 | 56950920 | 0.96 | rs4337355   | C      | T     | 0.23 | 0.34 | 0.42 |      |  |  |  |                   |                    | PPM1E             |                   | intronic         | 7                  |          |          |   |
| 17 | 56950926 | 0.93 | 17:54305708 | 13-mer | G     | 0.27 | 0.58 | 0.45 |      |  |  |  |                   |                    | PPM1E             |                   | intronic         | 5                  |          |          |   |
| 17 | 56954655 | 1.00 | rs12940492  | C      | G     | 0.22 | 0.35 | 0.42 |      |  |  |  |                   |                    | PPM1E             |                   | intronic         | 7                  |          |          |   |
| 17 | 56957968 | 0.93 | rs35028478  | A      | AGTTT | 0.26 | 0.21 | 0.29 |      |  |  |  |                   |                    | PPM1E             |                   | intronic         | 5                  |          |          |   |
| 17 | 56966052 | 1.00 | rs11659035  | C      | T     | 0.22 | 0.35 | 0.41 |      |  |  |  |                   |                    | PPM1E             |                   | intronic         | 6                  |          |          |   |
| 17 | 56972741 | 1.00 | rs11650809  | A      | G     | 0.22 | 0.35 | 0.4  |      |  |  |  |                   |                    | PPM1E             |                   | intronic         | 7                  |          |          |   |
| 17 | 56984757 | 0.93 | 17:54339539 | TTTA   | T     | 0.11 | 0.14 | 0.22 |      |  |  |  |                   |                    | Urothelia         | Pou3f3,Hoxb9,Cdx2 | PPM1E            | intronic           | 7        |          |   |
| 17 | 56986095 | 0.96 | rs11652761  | C      | T     | 0.21 | 0.36 | 0.41 |      |  |  |  |                   |                    | PPM1E             |                   | intronic         | 7                  |          |          |   |
| 17 | 56987142 | 1.00 | rs9901655   | G      | A     | 0.21 | 0.35 | 0.15 |      |  |  |  |                   |                    | PPM1E             |                   | intronic         | 6                  |          |          |   |
| 17 | 57008128 | 1.00 | rs7221274   | A      | G     | 0.22 | 0.35 | 0.42 |      |  |  |  |                   |                    | PPM1E             |                   | intronic         | 7                  |          |          |   |
| 17 | 57008912 | 0.96 | rs28709536  | C      | A     | 0.2  | 0.34 | 0.42 |      |  |  |  |                   |                    | PPM1E             |                   | intronic         | 7                  |          |          |   |
| 17 | 57009024 | 1.00 | rs11079367  | A      | G     | 0.22 | 0.35 | 0.42 |      |  |  |  |                   |                    | PPM1E             |                   | intronic         | 7                  |          |          |   |
| 17 | 57015777 | 0.93 | rs10541417  | GTC    | G     | 0.15 | 0.25 | 0.33 |      |  |  |  |                   |                    | PPM1E             |                   | intronic         | 7                  |          |          |   |
| 17 | 57028126 | 1.00 | rs6503888   | T      | C     | 0.21 | 0.35 | 0.38 |      |  |  |  |                   |                    | PPM1E             |                   | intronic         | 4                  |          |          |   |
| 17 | 57033816 | 0.93 | rs79776482  | A      | C     | 0    | 0.18 | 0    |      |  |  |  |                   |                    | Monocytes-CD14+   | KAP1,SETDB1       | Pax-5            | PPM1E              | intronic | NA       |   |
| 17 | 57038282 | 1.00 | rs2036730   | A      | G     | 0.22 | 0.35 | 0.41 |      |  |  |  |                   |                    |                   |                   | 5 altered motifs | PPM1E              | intronic | 6        |   |
| 17 | 57041293 | 1.00 | rs12944274  | G      | C     | 0.2  | 0.35 | 0.14 |      |  |  |  |                   |                    |                   |                   | Sox,Foxp1        | PPM1E              | intronic | 6        |   |
| 17 | 57043367 | 1.00 | rs2286299   | T      | G     | 0.23 | 0.35 | 0.4  |      |  |  |  |                   |                    |                   |                   | PPAR             | PPM1E              | intronic | 6        |   |
| 17 | 57047885 | 1.00 | rs10221208  | T      | C     | 0.22 | 0.35 | 0.42 |      |  |  |  |                   |                    |                   |                   | PPM1E            |                    | intronic | 5        |   |
| 17 | 57061978 | 1.00 | rs3809723   | T      | G     | 0.21 | 0.35 | 0.41 |      |  |  |  |                   |                    |                   |                   | PPM1E            |                    | intronic | 7        |   |
| 17 | 57065924 | 0.96 | rs6503891   | A      | C     | 0.2  | 0.36 | 0.42 |      |  |  |  |                   |                    |                   |                   | PPM1E            |                    | 3'-UTR   | 5        |   |
| 17 | 57067086 | 0.93 | rs6503892   | G      | A     | 0.22 | 0.35 | 0.42 |      |  |  |  |                   |                    |                   |                   | HAepiC           | PPM1E              | intronic | 6        |   |
|    |          |      |             |        |       |      |      |      |      |  |  |  |                   |                    |                   |                   |                  | UF1H3BETA,MAZ,Ik-1 | TRIM37   | intronic | 6 |
|    |          |      |             |        |       |      |      |      |      |  |  |  |                   |                    |                   |                   |                  | NR3C               | TRIM37   | intronic | 7 |

|    |          |      |             |       |        |      |      |      |                |                   |                   |          |        |   |
|----|----------|------|-------------|-------|--------|------|------|------|----------------|-------------------|-------------------|----------|--------|---|
| 17 | 57072461 | 0.96 | rs34718875  | G     | A      | 0.17 | 0.36 | 0.31 | HSMM           |                   | TRIM37            | intronic | 7      |   |
| 17 | 57074153 | 0.96 | rs10595343  | ATG   | A      | 0    | 0.24 | 0.3  |                |                   | TRIM37            | intronic | 6      |   |
| 17 | 57079742 | 1.00 | rs11652713  | C     | T      | 0.19 | 0.35 | 0.06 | GM12878, Huvec |                   | Esr1,Six          | intronic | 1f     |   |
| 17 | 57093825 | 0.96 | rs8080071   | C     | T      | 0.8  | 0.64 | 0.85 |                |                   | TRIM37            | intronic | 7      |   |
| 17 | 57094617 | 0.96 | rs4932691   | T     | C      | 0.82 | 0.64 | 0.86 |                |                   | Cdx2,Hoxb8,Hoxa10 | intronic | 6      |   |
| 17 | 57097047 | 1.00 | rs12943705  | T     | C      | 0.8  | 0.65 | 0    |                |                   | TRIM37            | intronic | 7      |   |
| 17 | 57102133 | 1.00 | rs2108435   | T     | C      | 0.8  | 0.65 | 0.64 |                | CTCF              | TRIM37            | intronic | 5      |   |
| 17 | 57105223 | 1.00 | rs8077332   | C     | T      | 0.8  | 0.65 | 0.85 | GM12878        | 6 cell types      | EWSR1-FLI1        | intronic | 1b     |   |
| 17 | 57108543 | 1.00 | rs9898048   | A     | G      | 0.8  | 0.65 | 0.85 |                | T-47D             | FOXA1             | intronic | 1f     |   |
| 17 | 57114148 | 1.00 | rs33922512  | C     | G      | 0.8  | 0.65 | 0.86 |                |                   | TRIM37            | intronic | 7      |   |
| 17 | 57123931 | 0.93 | 17:54478713 | A     | ACT    | 0.43 | 0.26 | 0.46 |                |                   | GATA1             | intronic | 6      |   |
| 17 | 57131294 | 0.93 | rs10634008  | T     | TAAACA | 0.67 | 0.67 | 0.56 |                |                   | TRIM37            | intronic | 6      |   |
| 17 | 57133010 | 1.00 | rs7218103   | T     | G      | 0    | 0.65 | 0    |                |                   | TRIM37            | intronic | 7      |   |
| 17 | 57134059 | 0.90 | rs9906653   | A     | G      | 0.8  | 0.63 | 0.84 |                |                   | TRIM37            | intronic | 7      |   |
| 17 | 57139293 | 1.00 | rs2877926   | G     | A      | 0.8  | 0.65 | 0.64 |                | NHEK              | JUND              | intronic | 4      |   |
| 17 | 57140304 | 0.93 | rs972849    | A     | T      | 0.8  | 0.63 | 0.81 |                |                   | 23 altered motifs | intronic | 6      |   |
| 17 | 57143404 | 1.00 | rs11869052  | T     | G      | 0.2  | 0.35 | 0.15 |                | A549,Caco-2,MCF-7 | TRIM37            | intronic | 4      |   |
| 17 | 57144355 | 1.00 | rs35180305  | C     | T      | 0.23 | 0.35 | 0.33 |                |                   | TRIM37            | intronic | 7      |   |
| 17 | 57149904 | 1.00 | rs9904621   | C     | T      | 0.2  | 0.35 | 0.19 |                |                   | Hoxb3,Pax         | intronic | 7      |   |
| 17 | 57151579 | 1.00 | rs11650456  | T     | C      | 0.2  | 0.35 | 0.19 | Huvec          | 5 cell types      | TRIM37            | intronic | 5      |   |
| 17 | 57158345 | 1.00 | rs7214402   | T     | C      | 0.19 | 0.35 | 0.19 |                |                   | Pou2f1            | intronic | 6      |   |
| 17 | 57159268 | 0.89 | rs34817776  | A     | C      | 0.2  | 0.34 | 0.33 |                |                   | Zbtb7b,Zfp740     | intronic | 6      |   |
| 17 | 57159990 | 1.00 | rs7503179   | A     | T      | 0.2  | 0.35 | 0.19 |                |                   | TRIM37            | intronic | 6      |   |
| 17 | 57162209 | 1.00 | rs12103622  | A     | G      | 0.21 | 0.35 | 0.23 |                | WER1-Rb-1         | TRIM37            | intronic | 5      |   |
| 17 | 57176106 | 1.00 | rs9892666   | A     | T      | 0.2  | 0.35 | 0.36 |                |                   | TRIM37            | intronic | 6      |   |
| 17 | 57177770 | 1.00 | rs8078926   | T     | C      | 0.18 | 0.35 | 0.11 |                |                   | Hoxa9,Hoxa10      | intronic | 7      |   |
| 17 | 57183266 | 0.86 | rs10590674  | CATAT | C      | 0.16 | 0.27 | 0.07 | 8 cell types   | Huvec             | TRIM37            | intronic | 5      |   |
| 17 | 57186832 | 0.93 | rs61092888  | G     | GT     | 0    | 0.15 | 0    |                |                   | 474bp 3' of SKA2  | NA       |        |   |
| 17 | 57187795 | 0.89 | rs7208282   | C     | T      | 0.14 | 0.33 | 0.12 |                |                   | 7 altered motifs  | SKA2     | 3'-UTR | 6 |
| 17 | 57201717 | 0.89 | rs2333445   | C     | G      | 0    | 0.33 | 0    | GM12878        |                   | SKA2              | intronic | 6      |   |

\*LD threshold was set to  $r2 \geq 0.8$  and for rs12699477, due to no surrogates passed 0.8 threshold, set to  $r2 \geq 0.7$

<sup>1</sup>RegulomeDB scores: 1a, eQTL + TF binding + matched TF motif + matched DNase Footprint + DNase peak; 1b, eQTL + TF binding + any motif + DNase Footprint + DNase peak; 1c, eQTL + TF binding + matched TF motif + DNase peak; binding + matched TF motif; 1d, eQTL + TF binding + any motif + DNase peak; 1e, eQTL + TF; 1f, eQTL + TF binding / DNase peak; 2a, TF binding + matched TF motif + matched DNase Footprint + DNase peak; 2b, TF binding + any motif + DNase Footprint + DNase peak; + any motif + DNase peak; 2c, TF binding + matched TF motif + DNase peak; 3a, TF binding; 3b, TF binding + matched TF motif; 4, TF binding + DNase peak; 5, TF binding or DNase peak; 6, other

**Supplementary Table 6** Prediction of potential regulatory SNPs

| variant    | Motifs changed        | RefSeq genes    | dbSNP func annot | Motif of interest 1                                                                    | LOD score 1 <sup>#</sup> | Motif of interest 2 | LOD score 2 <sup>#</sup> | Histone marks in H1-ESC        |
|------------|-----------------------|-----------------|------------------|----------------------------------------------------------------------------------------|--------------------------|---------------------|--------------------------|--------------------------------|
| rs2276910  | Hic1                  | <i>SMARCAD1</i> | intronic         | Hic1                                                                                   | >2.6                     |                     |                          | Active Promoter                |
| rs183993   | SEF-1                 | <i>SMARCAD1</i> | intronic         | None <sup>§</sup>                                                                      | NA <sup>§</sup>          |                     |                          | Weak/poised Promoter           |
| rs7439869  | Pou5f1, Sox           | <i>SMARCAD1</i> | missense         | Pou5f1 (OCT4)                                                                          | 6.9                      | Sox4                | >2.7                     | Transcriptional elongation     |
| rs35744894 | DMRT2                 | <i>HPGDS</i>    | intronic         | DMRT2                                                                                  | >6.9                     |                     |                          | Heterochromatin; Low/no signal |
| rs11768206 | Pou1f1, Pou3f2        | <i>MAD1L1</i>   | intronic         | Pou3f2                                                                                 | <-10.5                   | Pou1f1              | <-2.4                    | Weak transcribed               |
| rs12531315 | KROX                  | <i>MAD1L1</i>   | intronic         | KROX                                                                                   | <-2.7                    |                     |                          | Weak transcribed               |
| rs12536261 | Spz1                  | <i>MAD1L1</i>   | intronic         | Spz1                                                                                   | -0.6                     |                     |                          | Weak transcribed               |
| rs1801368  | Nrf-1                 | <i>MAD1L1</i>   | missense         | Nrf-1                                                                                  | <-0.9                    |                     |                          | Heterochromatin; Low/no signal |
| rs2280550  | Esr2, Esr1, YY1       | <i>MAD1L1</i>   | intronic         | ESR2                                                                                   | -3.7                     | ESR1                | <-1.9                    | Heterochromatin; Low/no signal |
| rs34145223 | KROX                  | <i>MAD1L1</i>   | intronic         | KROX                                                                                   | <-2.4                    |                     |                          | Weak transcribed               |
| rs34269264 | Spz1                  | <i>MAD1L1</i>   | intronic         | Spz1                                                                                   | 1.4                      |                     |                          | Weak transcribed               |
| rs34922657 | AP-2                  | <i>MAD1L1</i>   | intronic         | AP-2                                                                                   | >2.3                     |                     |                          | Weak transcribed               |
| rs35797753 | PU.1, Brachyury, GABP | <i>MAD1L1</i>   | intronic         | GABP                                                                                   | <-5                      |                     |                          | Weak transcribed               |
| rs4719366  | RREB-1                | <i>MAD1L1</i>   | intronic         | RREB                                                                                   | 2                        |                     |                          | Heterochromatin; Low/no signal |
| rs4721167  | PPARG, HNF4           | <i>MAD1L1</i>   | intronic         | PPARG                                                                                  | -4.1                     | HNF4 (RXR-alpha)    | <-2.1                    | Weak transcribed               |
| rs4721217  | AP-2                  | <i>MAD1L1</i>   | intronic         | AP-2                                                                                   | <-1.6                    |                     |                          | Heterochromatin; Low/no signal |
| rs7188880  | Smad3, AP-4           | <i>RFWD3</i>    | synonymous       | Smad3                                                                                  | <-2.5                    | AP-4                | -1                       | Transcriptional elongation     |
| rs4888262  | CREB, Gmeb1, E4F1     | <i>RFWD3</i>    | synonymous       | E4F1                                                                                   | -10.7                    |                     |                          | Transcriptional elongation     |
| rs58273376 | Zfp105                | <i>RFWD3</i>    | intronic         | Zfp105                                                                                 | 1.2                      |                     |                          | Transcriptional initiation     |
| rs302857   | NRSF                  | <i>TEX14</i>    | intronic         | NRSF (REST)                                                                            | -3.7                     |                     |                          | Heterochromatin; Low/no signal |
| rs302863   | PPARG, PLAG1, PPAR    | <i>TEX14</i>    | intronic         | PPARG                                                                                  | <-6.8                    |                     |                          | Heterochromatin; Low/no signal |
| rs369184   | Pax-8                 | <i>TEX14</i>    | intronic         | EGR1                                                                                   | NA <sup>%</sup>          |                     |                          | Active promotor                |
| rs430973   | Srf                   | <i>TEX14</i>    | intronic         | Srf                                                                                    | <-2.5                    |                     |                          | Active Promoter                |
| rs444393   | Myc                   | <i>TEX14</i>    | intronic         | Myc                                                                                    | >3                       |                     |                          | Active Promoter                |
| rs5821242  | Evi-1                 | <i>TEX14</i>    | intronic         | Evi-1                                                                                  | -2.9                     |                     |                          | Heterochromatin; Low/no signal |
| rs304269   | 7 altered motifs      | <i>RAD51C</i>   | intronic         | multiple forkhead box motifs                                                           | 12 (Foxc1)               |                     |                          | Heterochromatin; Low/no signal |
| rs11657676 | ZID                   | <i>PPM1E</i>    | intronic         | ZID                                                                                    | <-2.6                    |                     |                          | Weak transcribed               |
| rs11652713 | Esr1, Six             | <i>TRIM37</i>   | intronic         | Esr1                                                                                   | -2                       | Six                 | -0.3                     | Weak transcribed               |
| rs8077332  | EWSR1-FLI1            | <i>TRIM37</i>   | intronic         | None <sup>@</sup>                                                                      | NA <sup>@</sup>          |                     |                          | Weak transcribed               |
| rs8336     | miRNA binding         | <i>SMARCAD1</i> | 3'-UTR           | hsa-miR-573                                                                            |                          |                     |                          | Weak transcribed               |
| rs4888274  | miRNA binding         | <i>MLKL</i>     | 3'-UTR           | hsa-miR-483-3p, hsa-miR-483-3p, hsa-miR-502-5p, hsa-miR-502-5p, hsa-miR-99a, hsa-miR-9 |                          |                     |                          | Heterochromatin; Low/no signal |

<sup>#</sup> LOD score = LOD(alt)-LOD(ref) [change in log-odds score] of the motif, calculated by HaploReg

<sup>§</sup> Motif for non human TF

<sup>@</sup> Motif for fusion protein

<sup>%</sup> only predicted by Regulome (no LOD score available)

**Supplementary Table 7** Conditional analysis on the two multi-SNP loci identified by meta-analysis using NCI data

| cytoband | SNP        | Location(hg19) | distance(bps) | LD with conditioned SNP ( $r^2$ ) | NCI $P$ value | conditional $P$ in NCI | meta $P$ value | $P$ for heterogeneity |
|----------|------------|----------------|---------------|-----------------------------------|---------------|------------------------|----------------|-----------------------|
| 7p22.3   | rs10275045 | 1,920,826      | 48,127        | 0.66                              | 5.19E-05      | 0.040062               | 4.96E-08       | 8.92E-04              |
| 7p22.3   | rs12699477 | 1,968,953      | 0             | 1                                 | 4.64E-04      | conditioned SNP        | 5.59E-09       | 0.3177                |
| 7p22.3   | rs3778991  | 2,172,455      | 251,629       | 0.496                             | 4.76E-05      | 0.0171688              | 6.21E-06       | 0.0023                |
| 17q22    | rs9905704  | 56,632,543     | 0             | 1                                 | 1.88E-04      | conditioned SNP        | 4.32E-13       | 0.6678                |
| 17q22    | rs7221274  | 57,008,128     | 375,585       | 0.707                             | 3.56E-05      | 0.0613351              | 4.04E-09       | 0.1303                |
